# Supplementary material for: Polyvinyl chloride-based dielectric elastomer with high permittivity and low viscoelasticity for actuation and sensing
Source: PubMed Central journal article supplement (PMC10023783; doi:10.1038/s41467-023-37178-5), 2023-03-17
Supplement: 41467_2023_37178_MOESM2_ESM.pdf [file 41467_2023_37178_MOESM2_ESM.pdf]

## Peer Review File

---

Polyvinyl chloride-based dielectric elastomer with high permittivity and low viscoelasticity for actuation and sensing

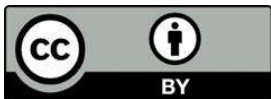

**Open Access** This file is licensed under a Creative Commons Attribution 4.0 International License, which permits use, sharing, adaptation, distribution and reproduction in any medium or format, as long as you give appropriate credit to the original author(s) and the source, provide a link to the Creative Commons license, and indicate if changes were made. In the cases where the authors are anonymous, such as is the case for the reports of anonymous peer reviewers, author attribution should be to 'Anonymous Referee' followed by a clear attribution to the source work. The images or other third party material in this file are included in the article's Creative Commons license, unless indicated otherwise in a credit line to the material. If material is not included in the article's Creative Commons license and your intended use is not permitted by statutory regulation or exceeds the permitted use, you will need to obtain permission directly from the copyright holder. To view a copy of this license, visit <http://creativecommons.org/licenses/by/4.0/>.

## Reviewers' Comments:

### Reviewer #1:

#### Remarks to the Author:

In this manuscript, the authors produced a polyvinyl chloride (PVC)-based elastomer by the introduction of cyanoethyl cellulose (CEC) into a plasticized PVC. The PVC-based elastomer shows high permittivity, low viscoelasticity, but the dielectric loss is not satisfactory. Besides a few issues need to be clarify.

1. It is unclear how the plasticized PVC named by the authors is processable. It is confusing that the authors named the matrix as plasticized PVC (in line 92), pristine PVC (in line 94), PVC (in Fig.2e), and the author should provide an explicit concept. Besides, the mass fraction of DOP exceeds 50%, Why the authors provided no more explanation about the role of DOP in the performance of PVC-based elastomer?
2. Why the authors chose the electric field of 9.09 V/ $\mu\text{m}$  for actuation test? The electric strength of all new DEs in this work needs to be supplied.
3. In line 69-71, the authors claimed that "DE actuators with low dielectric permittivity often require high electric field to drive ( $> 20 \text{ V}/\mu\text{m}$ ), leading to the high risks of current leakage and electrical breakdown", but it is inaccurate. If the electric field to drive is far lower than the breakdown strength while just a large value, the current leakage and electrical breakdown may not happen.
4. According to the Supplementary Fig.7, the actuation test of DEs may be under prestrain condition, and the authors need to clarify this point. About the results of actuation test, the authors cited some references to highlight the driving properties of DEs in this work, while the results of actuation test in the references of 9, 22, 35, were obtained under non-prestrain condition. Besides, the work of reference 36, is about polyurethane dielectric elastomer, not about VHB.
5. About stress relaxations of DEs, in line 195 the constant strain is 200%, while in line 205 the constant strain is 100%?
6. Except of Fig 3, the quality of other Figures needs to be improved.
7. Some crucial references should be cited in order to make a good understanding to this work. They include Chen et al. Nature 2019, 575, 324-329; Chen et al. Chemical Engineering Journal 2021, 405, 126634; Cao et al. Extreme Mechanics Letters 2020, 35, 100619; Feng et al. Chemical Reviews 2022, 122, 3820-3878 and Yin et al. Nature Communications 2021, 12, 4517.

### Reviewer #2:

#### Remarks to the Author:

Background: Dielectric elastomers show great promise as large strain artificial muscle. A challenge has been the high voltages and field strengths needed, with the devices operating close to breakdown and requiring kV level sources. If the voltage levels can be reduced to about 1 kV or less, the electronics is much less expensive. In order to achieve lower voltage operation, many investigators have sought to increase dielectric constant. This generally does not lead to improved strain, as voltage drops but so does breakdown strength, and elastic modulus rises. Another challenge is that the most commonly used elastomer - VHB - is highly viscoelastic in its behaviour, and so there is loss and creep. This is not the case in some silicones, which can achieve high bandwidth, relatively low loss, actuation - though silicones still requires high field strength. Kornbluh has achieved kHz frequency actuation of silicone, showing low loss.

The authors show that plasticized PVC with a high dielectric constant additive generate significant area strain (12%) at low field strength (9 kV/mm) compared to VHB, regular PVC, silicone and others. This is still a field strength well above the breakdown strength of air, but it is significantly lower than commonly used, and so is an important advance. The PVC additive used increases modulus, but produces a larger increase in dielectric constant, and reduces viscoelastic loss. Overall this leads to good low voltage actuation.

The authors compare creep and stress relaxation to that in the literature, for example in Figure 5d. How can a fair comparison be made, given the different loading conditions?

The authors have not expressed load in terms of stress, or described in the main text the amount of pre-strain used.

There has been substantial work on lowering voltage in dielectric elastomers by increasing dielectric constant, or reducing thickness. Early work on dielectrics was by Kofod I believe, and there has been a lot since, while a number of groups have sought to make thin elastomer layers. This work has not been properly summarized by the authors.

The improved sensor response compared to PVC is well presented. It is unclear how this performance compares to that of VHB and silicones.

What is the dielectric loss at typical operating frequencies/timescales - e.g. 1 Hz?

It is claimed that the actuators and sensors show fast response. I don't see a frequency response or time response analysis, or comparison with other materials.

What are the potential drawbacks of the approach? Do we expect a greater temperature dependence? Is breakdown strength reduced? Can large actuation be achieved, by applying higher voltages (why did the authors stop at the 9 V/micron)?

The sensor work is well presented. It is important to put this work in context of other capacitive sensor work, and perhaps provide some detail in the supplementary. There are also commercial sensors (e.g. Stretchsense) to compare with.

Overall, the paper makes a significant contribution to the field of electroactive polymers. It is written clearly and concisely. I would recommend considering it for publication, following revisions.

Reviewer #3:

Remarks to the Author:

The authors proposed a polyvinyl chloride (PVC) -based dielectric elastomer with high permittivity and low viscoelasticity by introduction of cyanoethyl cellulose (CEC) into a plasticized PVC. The physicochemical and electromechanical coupling property of the as-synthesized CEC/PVC were carefully studied. This work improved the performance of traditional PVC. However, the demonstrated performance of actuation and sensing of the presented material are not convincing to me. The paper cannot meet the standard of Nature Communications unless the authors could clarify the advantage of the material compared to the existing material.

The strategy of increasing permittivity and reducing viscosity in the material synthesis part sounds reasonable and interesting. However, if the material is aimed to serve for dielectric elastomer applications, these two indexes are apparently not dominated material properties. As shown in Fig. 5, the actuation strain of the new material falls within the order of 10%. A lot of existing studies have shown that various of materials without careful optimization and complicated synthesis can easily achieve this actuation level. Similar concerns apply for the sensing demo in this work. In the introduction, the authors pointed out that the VHB material, widely used in literature, has a clear drawback in viscous property. However, the synthesized new material improves its viscous property compared to VHB but significantly sacrifices its ability of large actuation, which, to the reviewer's opinion, is not satisfactory for dielectric elastomer applications.

1 **Responses to Reviewer #1:**

2 We thank the reviewer for her/his insightful report. We are delighted that the reviewer agreed that “*The PVC-*  
3 *based elastomer shows high permittivity, low viscoelasticity*”. Here we address the comments and technical  
4 questions raised by the reviewer with new experimental results and analyses.

5  
6 **COMMENT 1#:** *The PVC-based elastomer shows high permittivity, low viscoelasticity, but the dielectric loss*  
7 *is not satisfactory.*

8 **Response:** The heat generated due to dielectric losses of dielectric elastomers (DEs) would result in substantial  
9 increases in their temperature and conductivity over time, which would lower the breakdown strength and may  
10 lead to thermal or electrical breakdown [R1-R3]. Therefore, low levels of dielectric loss < 0.3 are highly  
11 preferred for DEA application as suggested by previous study [R4,R5]. However, the commonly used  
12 strategies for increasing dielectric permittivity, such as the addition of inorganic polar particles and conductive  
13 particles, are often associated with substantial increases in dielectric loss (e.g. > 0.5), leading to current leaking  
14 and/or electric breakdown. For instance, the addition of multiwalled carbon nanotube with 6-9 wt% loadings  
15 into PDMS precursors resulted in very high dielectric losses of 3.74-4.00 @ 1.0 kHz [R6]. By contrast, the  
16 dielectric loss of CEC/PVCg elastomers were maintained in a low value range 0.033-0.142 in this study (**Fig.**  
17 **R1a**). To address the reviewer’s concern, we measured the conductivity and breakdown strength of CEC/PVCg  
18 elastomers. Because according to dielectric percolation theory, the increase of dielectric loss is resulted from  
19 the formation of a connected conductive network by the conductive filler materials. The results showed that  
20 CEC/PVCg elastomers with conductivity range of  $3.40 \times 10^{-9}$ - $4.55 \times 10^{-9}$  S/cm were in a highly insulating state  
21 (**Fig. R1b** and **R1c**). Moreover, it was found that the addition of CEC only slightly decreased the breakdown  
22 strength. The breakdown strength of CEC/PVCg elastomers were 18.22-20.06 V/ $\mu\text{m}$  (**Fig. R1a**). Although a  
23 low electric field of 9.09 V/ $\mu\text{m}$  is applied to drive the DEA in this study, a large actuation strain, which is  
24 much larger than commercial VHB 4910 based DEA has been achieved with our CEC/PVCg DEA. Therefore,  
25 we believe the dielectric loss of CEC/PVCg elastomers here is low enough to support the large actuation while  
26 preventing the device breakdown.

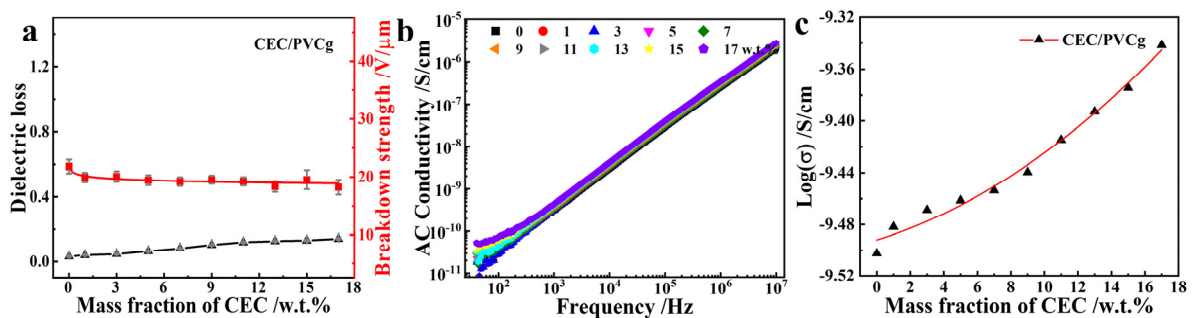

27

28 **Fig. R1** Dielectric property tests. Dielectric losses and breakdown strengths of CEC/PVCg elastomers with  
29 CEC mass loadings of 0-17 wt% (a). AC conductivities of CEC/PVCg elastomers with varying CEC loadings  
30 under  $40$ - $10^7$  Hz frequencies (b). Evolution of AC conductivity at 1 kHz for the CEC/PVCg elastomers (c).

31

32 The data has now been added into the revised manuscript as **Fig. 3c** and the relevant discussion at  
33 Page 7, Paragraph 3, as shown below:

34 “Dielectric loss is crucial for most DEs. Because the high levels of dielectric loss can result in substantial  
35 increases in both temperature and conductivity, which could potentially lead to thermal or electrical

breakdown<sup>43-45</sup>. Unfortunately, the commonly used strategies of increasing dielectric permittivity, such as the addition of inorganic polar particles and conductive particles, were often associated with a substantial increase in the dielectric loss (e.g. > 0.5 at 1 kHz), which would lower the breakdown strength and reduce the lifetime of actuators<sup>46,47</sup>. According to dielectric percolation theory, the increase of dielectric loss is mainly due to the increase of conductive filler materials and the formation of a connected conductive network. For instance, the addition of 6-9 wt% multiwalled carbon nanotube into PDMS resulted in very high dielectric losses of 3.74-4.00 @ 1.0 kHz<sup>48</sup>. By contrast, the introduction of CEC into PVCg matrix in this study induced a marginal increase, resulting in dielectric losses of < 0.15 at 1 kHz for CEC/PVCg elastomers (**Fig. 3c**), which are still in a low level for DEs as suggested by previous study<sup>49</sup>. The limited increase of dielectric loss following the addition of CEC could be ascribed to the highly electrical insulating nature of CEC (**Supplementary Note 2**). The measurement of conductivity indicated that the CEC/PVCg elastomers ( $4.0 \times 10^{-9}$  S/cm) were in a highly insulating state. Importantly, the breakdown strength was only slightly decreased by 10.4 % following the addition of CEC and kept almost constant for CEC/PVCg elastomers with different loading concentrations of CEC (**Fig. 3c** and **Supplementary Information Fig. S4**). The detected breakdown strength of CEC/PVCg elastomers with 9 wt% CEC was 19.53 V/ $\mu$ m. Thus, a much lower driving electric field of 9.09 V/ $\mu$ m was used in all of experiments in this study in order to prolong the working life of device and achieve a stable performance while generating a desired large area strain.”

**COMMENT 2#:** It is unclear how the plasticized PVC named by the authors is processable. It is confusing that the authors named the matrix as plasticized PVC (in line 92), pristine PVC (in line 94), PVC (in Fig.2e), and the author should provide an explicit concept. Besides, the mass fraction of DOP exceeds 50%, Why the authors provided no more explanation about the role of DOP in the performance of PVC-based elastomer?

**Response:** We thank the reviewer for her/his suggestion. We have corrected the manuscript by naming pure PVC as pure PVC and naming plasticized PVC as PVC gel (PVCg) because of the plasticized PVC is in a gel-like form.

The major purpose of adding a plasticizer, *i.e.* DOP in this study, into PVC matrix is to increase the compliance and flexibility of PVC, which is critical for their actuation and sensing performances. As per the actuation strain equation of  $S_z = \epsilon_r \epsilon_0 E^2 / Y$ , the matrix film with a lower modulus ( $Y$ ) would generate a larger actuation strain ( $S$ ) [R7-R9]. It has been suggested that DEs with a modulus less than 1 MPa is preferred for actuation application [R7]. The pure PVC has a very high modulus of 23.2 MPa (**Fig. R2a** and **R2c**), which is not suitable for actuation and sensing applications. The introduction of DOP would weaken the molecular interactions among PVC chains, leading to the transition of PVC matrix from glassy-state to hyperelastic-state with the high flexibility [R10]. Our results showed that the addition of 50-80 wt% DOP into PVC matrix significantly reduced the moduli to 0.02-0.54 MPa and increased the elongation at break to 200-560 % (**Fig. R2b** and **R2c**), making the matrix more favorable for actuation and sensing applications.

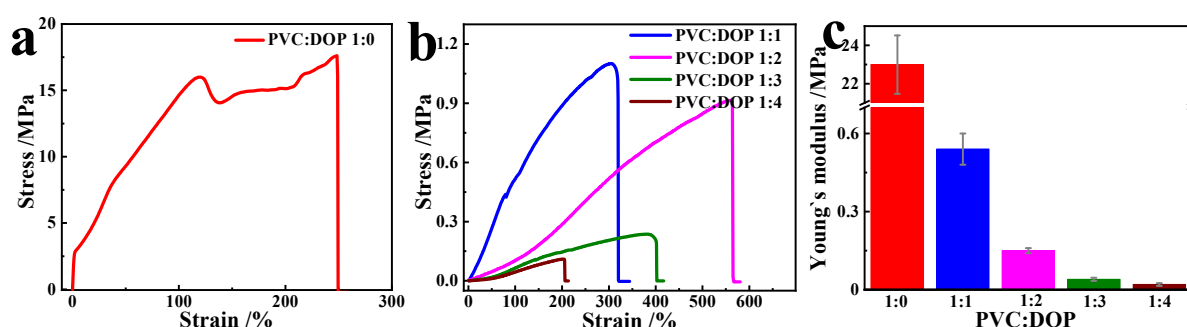

72 **Fig. R2** Mechanical property tests. Stress-strain curves of the self-casting (a) PVC plastics and (b) PVCg  
 73 elastomers with PVC: DOP mass ratios of 1:1, 1:2, 1:3, 1:4, and (c) their Young's moduli.  
 74

75 Although the introduction of plasticizer is a common strategy to generate large actuation of PVC-  
 76 based DEs, the plasticized PVC suffers from inherent strong viscoelastic effects, which results in evident  
 77 mechanical loss, stress relaxation, and viscoelastic hysteresis, eventually leading to instability and attenuation  
 78 of output signals over time as well as delayed response in actuation and sensing applications [R11, R12]. Both  
 79 dynamic and static viscoelasticity of plasticized PVC, *i.e.* PVCg, as a function of the loading concentrations  
 80 of DOP were measured and shown in the following **Fig. R3** and **Fig. R4**, respectively. The dynamic  
 81 viscoelasticity, *i.e.* mechanical loss of PVCg ( $\tan \delta = G''/G'$ ), was increased by 15.50 folds by increasing the  
 82 loading concentration of DOP from 50 wt% (1:1) to 80 wt% (1:4) (**Fig. R3**). Under constant load of 60 g for  
 83 6 hours, the creep-induced elongation increased from 25 % for PVCg (1:1) to 60 % for PVCg (1:4) (**Fig. R4a-**  
 84 **4d**). Similarly, under constant strain of 100 % for 10 min, the recorded stress attenuation increased from 11.41 %  
 85 for PVCg (1:1) to 33.99 % for PVCg (1:4) (**Fig. R4e** and **4f**). Notably, currently existing PVC matrix used as  
 86 DEA or DES often contain much larger concentrations of plasticizer (> 90 wt%) than this study [R13], leading  
 87 to even stronger viscoelastic effects than what we demonstrated here. In addition, the introduction of DOP  
 88 decreased the breakdown strength of PVC matrix due to the percolation effect of DOP, as shown in the  
 89 following **Fig. R5a**.

90 To conclude, the increase of plasticizer content in PVCg resulted in lower elastic modulus (*i.e.* higher  
 91 flexibility), higher viscoelastic effects, and a lower breakdown strength. Therefore, we choose the mass ratio  
 92 of 1: 2 (PVC: plasticizer) to balance these properties of PVCg. More importantly, the introduction of CEC into  
 93 the plasticized PVCg can address this long-standing challenge by significantly reducing its viscoelastic effects  
 94 and concurrently achieving the high permittivity.

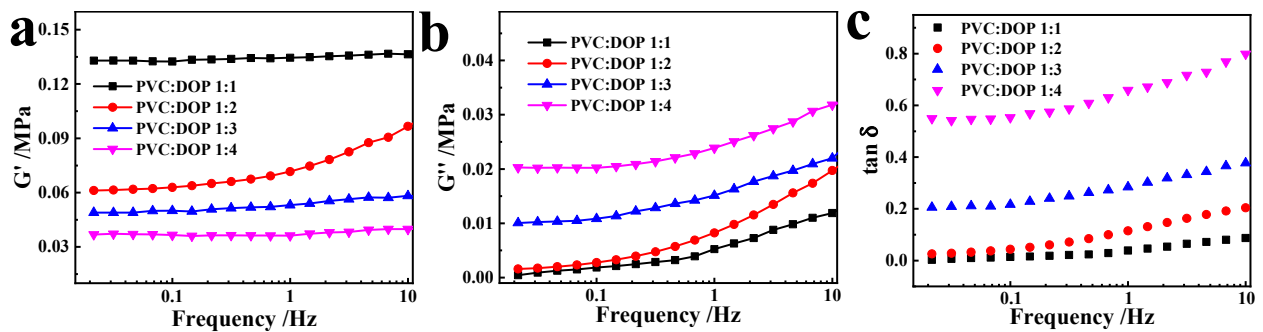

95 **Fig. R3** Dynamic viscoelasticity tests of PVCg elastomers with varying DOP concentrations. Evolutions of (a)  
 96 storage moduli ( $G'$ ), (b) loss moduli ( $G''$ ), and (c) the counted mechanical losses ( $\tan \delta = G''/G'$ ) under  
 97 frequencies of 0.01-10 Hz.  
 98

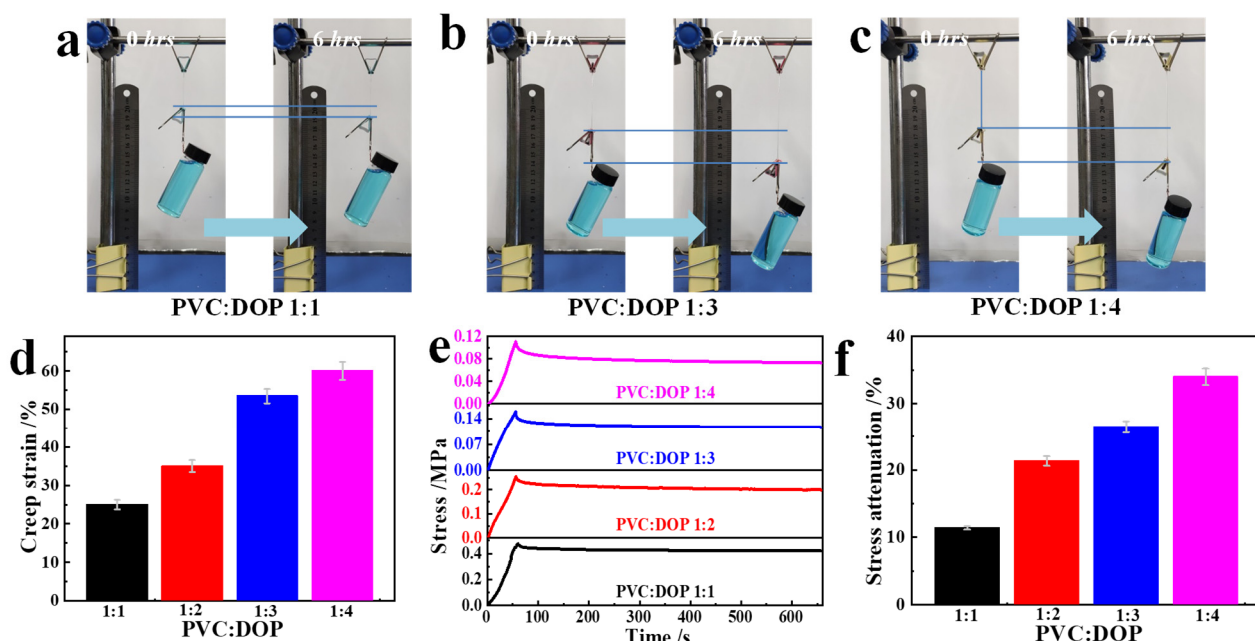

99

100 **Fig. R4** Static viscoelasticity of PVCg elastomers with varying DOP concentrations. Creep behaviors for PVCg  
 101 elastomers with PVC: DOP mass ratios of (a) 1:1, (b) 1:3, (c) 1:4 under a constant load of 60 g for 6 hours  
 102 (data of the elastomer of mass ratio of 1:2 was shown formerly). Quantifications of (d) creep strains, (e) stress  
 103 relaxations, and (f) percentages of stress attenuation of PVCg elastomers with PVC: DOP mass ratios of 1:1,  
 104 1:2, 1:3, 1:4.

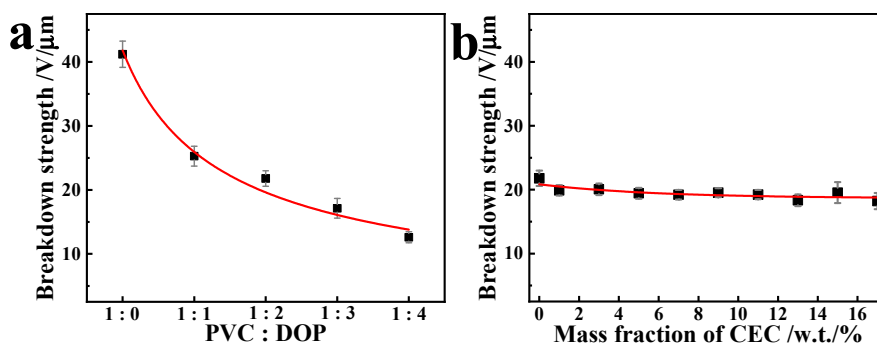

105

106 **Fig. R5** Measurement of breakdown strengths. (a) Evolution of breakdown strengths for PVCg elastomers  
 107 with varying DOP concentrations. (b) Evolution of breakdown strengths for CEC/PVCg elastomers with  
 108 varying CEC concentrations.

109

110 We have now added the new data into the revised supplementary materials and relevant discussion  
 111 about the rationale and impacts of the introduction of DOP into PVC in the **Supplementary Note 1** and the  
 112 revised manuscript at Page 4, Paragraph 2 and Page 19 and Paragraph 2, as shown below:

113 “The plasticizers are often introduced into PVC matrices in order to produce highly flexible PVCg elastomers  
 114 with high flexibility by weakening the interaction forces among PVC chains<sup>29</sup> (**Supplementary Information**  
 115 **Fig. S1**). However, the plasticized PVCg suffer from low breakdown strength and inherent strong viscoelastic  
 116 effects<sup>30</sup>, which leads to time-dependent change of internal stress and strain<sup>31</sup>, *i.e.* creep (**Supplementary**  
 117 **Information Fig. S3**).”

118 “The loading concentration of DOP, *i.e.* 2:1 mass ratio of PVC: DOP, was chose to balance the flexibility,



119 viscoelastic effects, and breakdown strength of the resulting PVCg (Supplementary Note 1).”

120

121 *COMMENT 3#:* Why the authors chose the electric field of 9.09 V/μm for actuation test? The electric strength  
122 of all new DEs in this work needs to be supplied.

123 **Response:** Existing DEAs often requires high driving electrical field to achieve large strain, which, however,  
124 could potentially lead to polymer creep, current leakage, and electrical breakdown. In addition, it also needs a  
125 bulky, high-voltage power supply system, hampering its wide-spread applications [R14]. Therefore, generation  
126 of a large strain under low driving voltages is highly desirable for DEAs, which remains a challenge. In this  
127 study, we have measured the electric breakdown strength of all DEs, as shown in the Fig. R5. The breakdown  
128 strength of plasticized PVCg (1:2) was about 20 V/μm. The introduction of CEC with various loading  
129 concentrations have limited impacts on the breakdown strength while it dramatically increased permittivity.  
130 Thus, a relative low working voltage of 9.09 V/μm was selected in order to prolong the working life of the  
131 device, achieve a stable performance while generating a desired large area strain [R15-18]. Notably, such strain  
132 of 12.22 % was achieved under a very small pre-strain of 25 %, which was negligible when compared to other  
133 pre-strains such as 540 % and 400 % [R19, R20]. We have now provided the new data of breakdown strength  
134 measurement in the revised manuscript as Fig. 3c and discussions on the reason for choosing the low electric  
135 field of 9.09 V/μm at Page 8, Paragraph 1, as shown below:

136 “Importantly, the breakdown strength was only slightly decreased by 10.4 % following the addition of CEC  
137 and kept almost constant for CEC/PVCg elastomers with different loading concentrations of CEC (Fig. 3c and  
138 Supplementary Information Fig. S4). The detected breakdown strength of CEC/PVCg elastomers with 9 wt%  
139 CEC was 19.53 V/μm. Thus, a much lower driving electric field of 9.09 V/μm was used in all of experiments  
140 in this study in order to prolong the working life of device and achieve a stable performance while generating  
141 a desired large area strain.”

142

143 *COMMENT 4#:* In line 69-71, the authors claimed that “DE actuators with low dielectric permittivity often  
144 require high electric field to drive (> 20 V/μm), leading to the high risks of current leakage and electrical  
145 breakdown”, but it is inaccurate. If the electric field to drive is far lower than the breakdown strength while  
146 just a large value, the current leakage and electrical breakdown may not happen.

147 **Response:** We agree with the reviewer that when the driving electric field is far lower than the breakdown  
148 strength, the current leakage and electrical breakdown should not happen. Unfortunately, the existing DE  
149 actuators often required the high driving electric fields that are close to their breakdown strength in order to  
150 achieve large strain because of their low permittivity. For example, as we measured in this study, VHB-based  
151 actuators produced rather small area strain of 3.45 % under driving electric field of 22.5 V/μm, which is close  
152 to their breakdown strength of 28.4 V/μm [R15] (Supplementary Table S2). PDMS (Gelest OE™ Extended  
153 Cure)-based actuator required 30 V/μm, which was the measured breakdown strength, to achieve the area strain  
154 of 4.63 % [R21]. In addition, even the driving voltage is far lower than breakdown strength, a high value of  
155 several kilovolts arises safety issues and brings a problem of using a bulky high-voltage power supply system.  
156 To address the reviewer’s concern, we have updated our description and added more discussions on this issue  
157 in the revised manuscript Page 3 and Paragraph 1, as shown below:

158 “DE actuators with low dielectric permittivity, such as PDMS and VHB materials, often require high driving  
159 electric fields (> 20 V/μm) to achieve large actuations, which would lead to the high risks of current leakage<sup>15</sup>  
160 and electrical breakdown<sup>16</sup> when such high driving electric fields are close to their breakdown strength. In  
161 addition, a high value of several kilovolts arises safety issues and brings about the problem of using a bulky  
162 high-voltage power supply system<sup>17</sup>.”



163 **COMMENT 5#:** According to the Supplementary Fig.7, the actuation test of DEs may be under prestrain  
164 condition, and the authors need to clarify this point. About the results of actuation test, the authors cited some  
165 references to highlight the driving properties of DEs in this work, while the results of actuation test in the  
166 references of 9, 22, 35, were obtained under non-prestrain condition. Besides, the work of reference 36, is  
167 about polyurethane dielectric elastomer, not about VHB.

168 **Response:** We thank the reviewer for bringing up this important issue. We have now clarified that the DEAs  
169 were under 25 % pre-strain in this study in the revised manuscript. We have corrected our citation of Reference  
170 36. Moreover, we have prepared the PDMS and VHB 4910-based DEAs and measured their actuation  
171 performances under the exact same conditions in order to make a fair comparison to our CEC/PVCg-based  
172 actuators. As shown in the following **Fig. R6**, the detected area strains were 1.46-12.22 % for the CEC/PVCg  
173 actuators under the driving electrical fields of 5.45-9.09 V/ $\mu\text{m}$ , 0.81-3.15 % for the PVCg actuators under 5.45-  
174 9.09 V/ $\mu\text{m}$ , 0.65-2.44 % for the PDMS actuators under 5.85-9.07 V/ $\mu\text{m}$ , while VHB 4910 actuators cannot be  
175 activated under the driving electrical field  $< 12.5$  V/ $\mu\text{m}$ , *i.e.* strain of 0 %. The area strains of VHB 4910  
176 actuators were 0.72-3.45 % when the driving electrical fields were further increased to 12.5-22.5 V/ $\mu\text{m}$ . To  
177 conclude, our CEC/PVCg actuators produced the largest actuation strains under low driving voltages as  
178 compared to the commonly used PDMS and VHB-based actuators. We have now provided the new data as  
179 **Fig. 6b** and relevant discussions in the revised manuscript at Page 11, Paragraph 3, and Page 20, Paragraph 1,  
180 as shown below:

181 “According to the strain model shown in **Supplementary Information Fig. S12**, the counted area strain  
182 generated by the CEC/PVCg actuators was 12.22 % (with 9 wt% CEC, under driving voltage of 9.09 V/ $\mu\text{m}$ ,  
183 pre-strain of 25 %), which represents 3.9-fold increase as compared to the PVCg actuators (**Fig. 5b**). In addition,  
184 we prepared the commonly used PDMS and VHB-based actuators and measured their actuation strains under  
185 the same conditions as the comparison (**Fig. 5b, Supplementary Table S2, and Supplementary Information**  
186 **Fig. S15**). PDMS actuators produced strains of 0.65-2.44 % under electrical fields of 5.85-9.07 V/ $\mu\text{m}$ . VHB  
187 4910 actuators could not be triggered, *i.e.* 0 % area strain, under electrical fields  $< 12.5$  V/ $\mu\text{m}$  and produced  
188 only 0.72-3.45 % strains by further increasing electrical fields to 12.5-22.5 V/ $\mu\text{m}$ . Therefore, our CEC/PVCg  
189 actuators generated significantly larger actuation strains, *i.e.*  $> 5$  times, than commonly used PDMS and VHB  
190 4910 actuators, which was largely attributed to the augmentation of the electromechanical coupling sensitivity  
191  $k$  of CEC/PVCg (**Fig. 3e**).”

192  
193 “The initial flexion amplitude of 12 mm was generated by using the elastic spring as a pre-load, which  
194 corresponded to a pre-strain of 25 %.”  
195

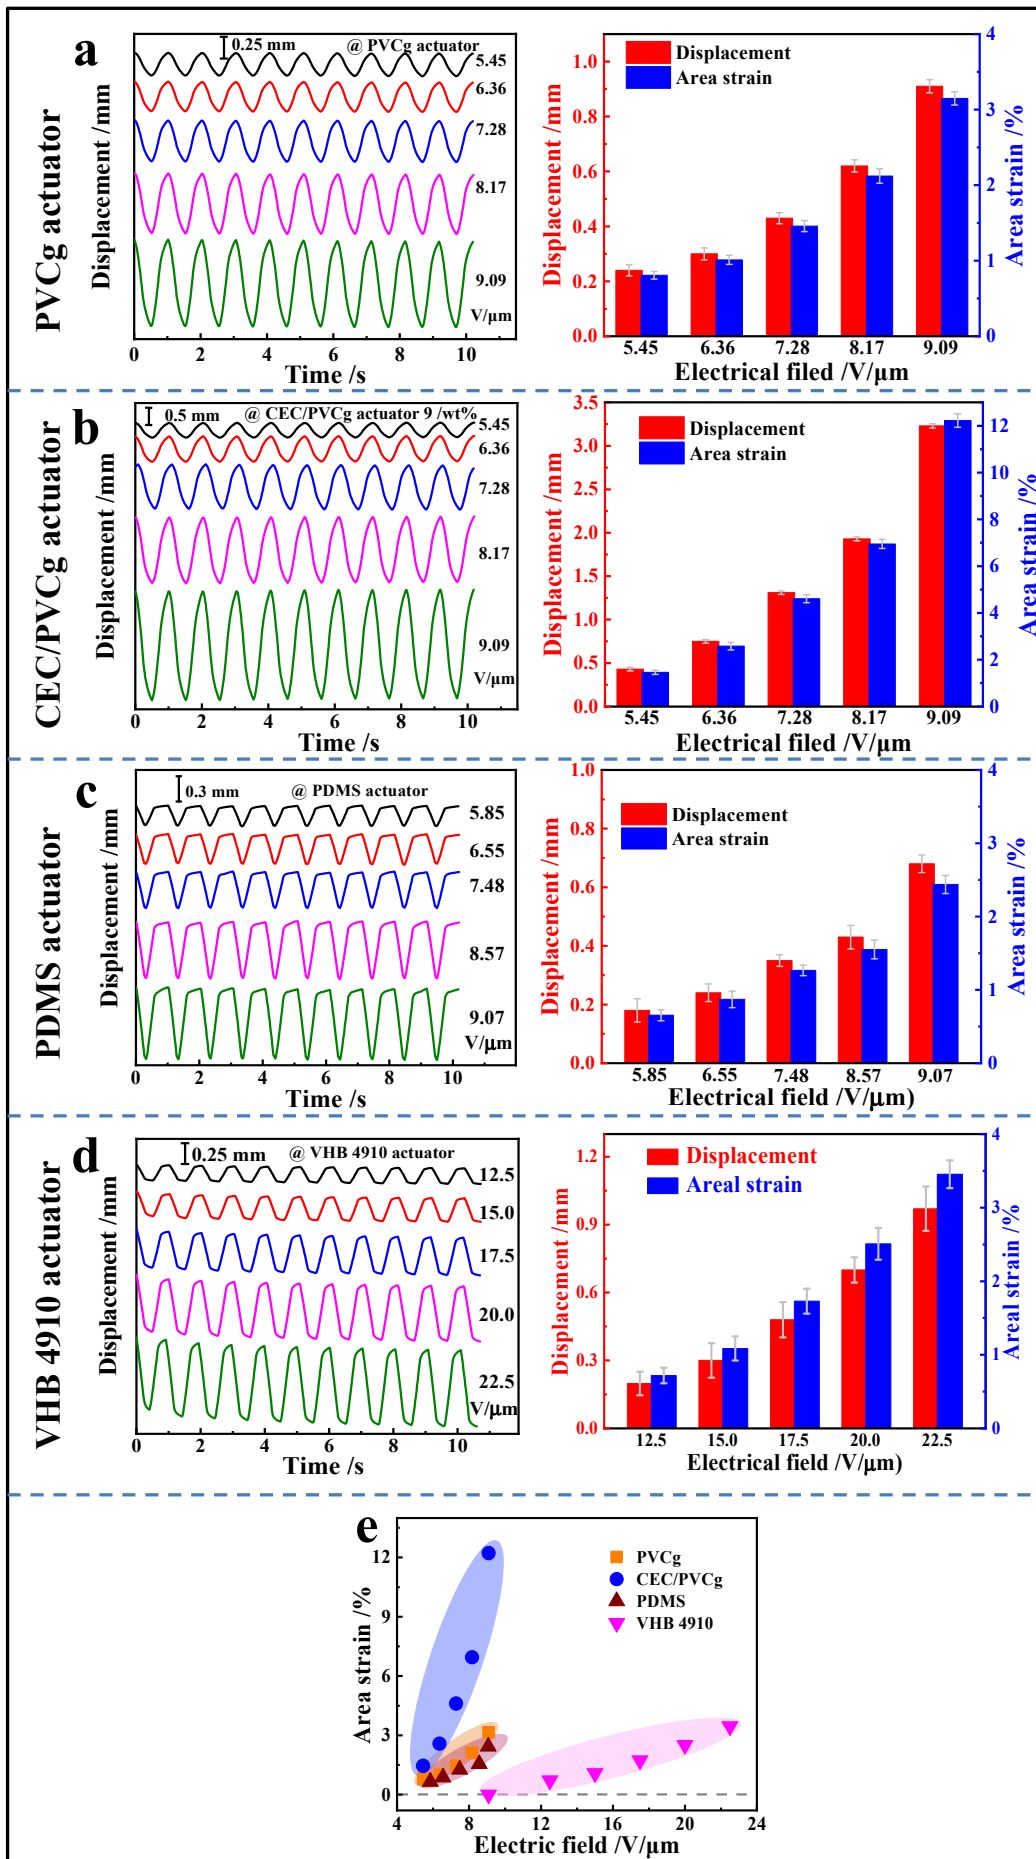

197 **Fig. R6** Evaluation of actuation properties of (a) PVCg, (b) CEC/PVCg, (c) PDMS, (d) VHB 4910 actuators  
198 by measuring their flexion displacements and area strains under various driving voltages. (e) The comparison  
199 of area strains (mean values) that were generated by different actuators.

200

201 *COMMENT 6#:* About stress relaxations of DEs, in line 195 the constant strain is 200 %, while in line 205  
202 the constant strain is 100 %?

203 **Response:** 200 % was a typo and we have corrected the value of constant strain to 100 % in the revised  
204 manuscript.

205

206 *COMMENT 7#:* Except of Fig 3, the quality of other Figures needs to be improved.

207 **Response:** We have now improved the quality and resolution of all the figures. We have now submitted all  
208 figures in the format of .TIFF instead of word file in the initial submission, which reduce the resolution of  
209 figures.

210

211 *COMMENT 8#:* Some crucial references should be cited in order to make a good understanding to this work.  
212 They include Chen et al. *Nature* 2019, 575, 324-329; Chen et al. *Chemical Engineering Journal* 2021, 405,  
213 126634; Cao et al. *Extreme Mechanics Letters* 2020, 35, 100619; Feng et al. *Chemical Reviews* 2022, 122,  
214 3820-3878 and Yin et al. *Nature Communications* 2021, 12, 4517.

215 **Response:** We thank the reviewer for bringing these important articles to our attention. We have now added  
216 and discussed the following references in the revised manuscript as shown below:

217 “DE actuators (DEAs) are attractive artificial muscles due to their high energy density<sup>7</sup> and conversion  
218 efficiency<sup>8</sup>, and fast response<sup>9</sup>.”

219 “For example, the dielectric permittivity of widely used DEs are 2.2-3.0 for polydimethylsiloxane (PDMS)<sup>11</sup>,  
220 4.4-4.7 for VHB acrylic elastomer (3M)<sup>12,13</sup>, and 4.0 for pure polyvinyl chloride (PVC)<sup>14</sup>.”

221 “In addition, a high value of several kilovolts arises safety issues and brings about the problem of using a  
222 bulky high-voltage power supply system<sup>17</sup>.”

223

224 7. Chen, Y. F. et al. Controlled flight of a microrobot powered by soft artificial muscles. *Nature* **575**, 324-  
225 329 (2019).

226 8. Feng, Q. K. et al. Recent progress and future prospects on all-organic polymer dielectrics for energy  
227 storage capacitors. *Chem. Rev.* **122**, 3820-3878 (2022).

228 9. Cao, C. J., Gao, X., Burgess, S. & Conn, A. T. Power optimization of a conical dielectric elastomer  
229 actuator for resonant robotic systems. *Extreme Mech. Lett.* **35**, 100619 (2020).

230 12. Yin, L. J. et al. Soft, tough, and fast polyacrylate dielectric elastomer for non-magnetic motor. *Nat.*  
231 *Commun.* **12**, 4517 (2021).

232 17. Chen, Z. Q. et al. Ultrasoft-yet-strong pentablock copolymer as dielectric elastomer highly responsive to  
233 low voltages. *Chem. Eng. J.* **405**, 126634 (2021).

234

235

236

237

238

239

240  
241  
242  
243  
244  
245  
246  
247  
248  
249  
250  
251  
252  
253  
254  
255  
256  
257  
258  
259  
260  
261  
262  
263  
264  
265  
266  
267  
268  
269  
270  
271  
272  
273  
274  
275  
276  
277  
278  
279  
280  
281  
282  
283  
284

## References

- [R1] Khanchaitit, P., Han, K., Gadinski, M. R., Li, Q. & Wang, Q. Ferroelectric polymer networks with high energy density and improved discharged efficiency for dielectric energy storage. *Nat. Commun.* **4**, 2845 (2013).
- [R2] Madsen, F. B., Yu, L., Mazurek, P. S. & Skov, A. L. A simple method for reducing inevitable dielectric loss in high-permittivity dielectric elastomers. *Smart. Mater. Struct.* **25**, 075018 (2016).
- [R3] Shamsul, Z., Morshuis, P. H. F., Yahia, B. M., Gernaey, K. V. & Skov, A. L. The electrical breakdown of thin dielectric elastomers: thermal effects. *Proc. SPIE* **9056**, 90562V (2014).
- [R4] Opris, D. M. et al. New silicone composites for dielectric elastomer actuator applications in competition with acrylic foil. *Adv. Funct. Mater.* **21**, 3531-3539 (2011).
- [R5] Guan, J. P., Xing, C. Y., Wang, Y. Y., Li, Y. J. & Li, J. Y. Poly (vinylidene fluoride) dielectric composites with both ionic nanoclusters and well dispersed graphene oxide. *Compos. Sci. Technol.* **138**, 98-105 (2017).
- [R6] Kohlmeyer, R. R. et al. Electrical and dielectric properties of hydroxylated carbon nanotube-elastomer composites. *J. Phys. Chem. C* **113**, 17626-17629 (2009).
- [R7] Madsen, F. B., Daugaard, A. E., Hvilsted, S. & Skov, A. L. The current state of silicone-based dielectric elastomer transducers. *Macromol. Rapid Commun.* **37**, 378-413 (2016).
- [R8] Romasanta, L. J., Lopez-Manchado, M. A. & Verdejo, R. Increasing the performance of dielectric elastomer actuators: a review from the materials perspective, *Prog. Polym. Sci.* **51**, 188-211 (2015).
- [R9] Plante, J. S. & Dubowsky, S. Large-scale failure modes of dielectric elastomer actuators. *Int. J. Solids Struct.* **43**, 7727-7751 (2006).
- [R10] Daniels, P. H. A brief overview of theories of PVC plasticization and methods used to evaluate PVC-plasticizer interaction. *J. Vinyl. Addit. Technol.* **15**, 219-223 (2009).
- [R11] Tan, M. W. M., Thangavel, G. & Lee, P. S. Enhancing dynamic actuation performance of dielectric elastomer actuators by tuning viscoelastic effects with polar crosslinking. *NPG Asia Mater.* **11**, 62 (2019).
- [R12] Zou, J. & Gu, G. Y. Modeling the viscoelastic hysteresis of dielectric elastomer actuators with a modified rate-dependent prandtl-ishlinskii model. *Polymers* **10**, 525 (2018).
- [R13] Li, Y. & Hashimoto, M. PVC gel based artificial muscles: Characterizations and actuation modular constructions. *Sens. Actuators A: Phys.* **233**, 246-258 (2015).
- [R14] Chen, Z. Q. et al. Ultrasoft-yet-strong pentablock copolymer as dielectric elastomer highly responsive to low voltages. *Chemical Engineering Journal. Chem. Eng. J.* **405**, 126634 (2021).
- [R15] Yin, L. J. et al. Soft, tough, and fast polyacrylate dielectric elastomer for non-magnetic motor. *Nat. Commun.* **12**, 4517 (2021).
- [R16] Shankar, R., Ghosh, T. K. & Spontak, R. J. Electromechanical response of nanostructured polymer systems with no mechanical pre-strain. *Macromol. Rapid Commun.* **28**, 1142-1147 (2007).
- [R17] Zhao, Y. et al. Remarkable electrically actuation performance in advanced acrylic-based dielectric elastomers without pre-strain at very low driving electric field. *Polymer* **137**, 269-275 (2018).
- [R18] Yang, C. X., Gao, X. & Luo, Y. W. End-block-curing ABA triblock copolymer towards dielectric elastomers with both high electro-mechanical performance and excellent mechanical properties. *Chem. Eng. J.* **382**, 123037 (2020).
- [R19] Pelrine, R., Kornbluh, R., Pei, Q. B. & Joseph, J. High-speed electrically actuated elastomers with strain greater than 100%. *Science* **287**, 836-845 (2000).
- [R20] Huang, J. S. et al. Giant, voltage-actuated deformation of a dielectric elastomer under dead load. *Appl. Phys. Lett.* **100**, 041911 (2012).
- [R21] Sadroddini, M. & Kashani, M. R. Silica-decorated reduced graphene oxide (SiO<sub>2</sub>@rGO) as hybrid fillers

285 for enhanced dielectric and actuation behavior of polydimethylsiloxane composites. *Smart Mater. Struct.*  
286 **29**, 015028 (2020).  
287

288 **Responses to Reviewer #2:**

289 We are grateful for reviewer's detailed and positive comments on our manuscript. We thank the reviewer for  
290 his/her very encouraging remarks that "Overall, the paper makes a significant contribution to the field of  
291 electroactive polymers. It is written clearly and concisely. I would recommend considering it for publication,  
292 following revisions." We are also delighted that the reviewer agreed that the viscoelastic effects of our device  
293 is "significantly lower than commonly used, and so is an important advance", "The PVC additive used  
294 increases modulus, but produces a larger increase in dielectric constant, and reduces viscoelastic loss. Overall,  
295 this leads to good low voltage actuation" Here we address the comments and the technical questions from the  
296 reviewer with the new experimental data and analysis.

297

298 **COMMENT #1:** *The authors compare creep and stress relaxation to that in the literature, for example in*  
299 *Figure 5d. How can a fair comparison be made, given the different loading conditions?*

300 **Response:** To address reviewer's concern, we have prepared PDMS and VHB 4910-based actuators and  
301 evaluated their actuation performances under the exact same conditions as our CEC/PVCg actuators. First, the  
302 actuation displacements over 1000 cycles, *i.e.* 1000 seconds of four types of actuators were measured and the  
303 relative displacement shifts (RDS) were calculated to quantify their viscoelastic drifts. As shown in the  
304 following **Fig. R1a-1e**, the RDS values of VHB 4910, PDMS, PVCg, and CEC/PVCg actuators were 136.09 %,  
305 5.70 %, 59.40 %, and 7.78 %, respectively. Our CEC/PVCg actuators showed a very low shift of displacement  
306 over 1000 cycles of actuation, which was 94 % and 87 % reductions as compared to VHB 4910 and PVCg  
307 actuators. Second, the area strains of four types of DEAs were measured (**Fig. R1f**). The detected area strains  
308 of PDMS, PVCg, and CEC/PVCg actuators were 2.44 %, 3.15%, and 12.22 %, respectively under the driving  
309 electric field of 9.09 V/ $\mu\text{m}$ . VHB 4910 actuators cannot be activated under the driving electrical field < 12.5  
310 V/ $\mu\text{m}$ , *i.e.* strain of 0 %, and showed area strains of 0.72 %-3.45 % when the driving electrical fields were  
311 further increased to 12.5-22.5 V/ $\mu\text{m}$ . Our CEC/PVCg actuators showed > 4-fold increases in area strains as  
312 compared to other three types of actuators. To conclude, Our CEC/PVCg actuators showed low viscoelastic  
313 effects and large area strains, demonstrating the significant improvement in actuation performances as  
314 compared to the existing dielectric elastomer actuators, such as PDMS and VHB 4910.

315 We have now provided the updated data of area strains and displacement shifts as **Fig. 5b** and **5d** in  
316 the revised manuscript. The relevant descriptions and discussions were provided in the revised manuscript at  
317 Page 11, Paragraph 3 and Page 12, Paragraph 2, as shown below:

318 "According to the strain model shown in **Supplementary Information Fig. S12**, the counted area strain  
319 generated by the CEC/PVCg actuators was 12.22 % (with 9 wt% CEC, under driving voltage of 9.09 V/ $\mu\text{m}$ ,  
320 pre-strain of 25 %), which represents 3.9-fold increase as compared to the PVCg actuators (**Fig. 5b**). In addition,  
321 we prepared the commonly used PDMS and VHB-based actuators and measured their actuation strains under  
322 the same conditions as the comparison (**Fig. 5b, Supplementary Table S2, and Supplementary Information**  
323 **Fig. S15**). PDMS actuators produced strains of 0.65-2.44 % under electrical fields of 5.85-9.07 V/ $\mu\text{m}$ . VHB  
324 4910 actuators could not be triggered, *i.e.* 0 % area strain, under electrical fields < 12.5 V/ $\mu\text{m}$  and produced  
325 only 0.72-3.45 % strains by further increasing electrical fields to 12.5-22.5 V/ $\mu\text{m}$ . Therefore, our CEC/PVCg  
326 actuators generated significantly larger actuation strains, *i.e.* > 5 times, than commonly used PDMS and VHB  
327 4910 actuators, which was largely attributed to the augmentation of the electromechanical coupling sensitivity  
328 *k* of CEC/PVCg (**Fig. 3e**)."

329 "The displacements of the PVCg, CEC/PVCg, PDMS, and VHB 4910 actuators were measured and recorded  
330 over actuation for 1000 cycles, *i.e.* 1000 seconds (**Fig. 5c** and **Supplementary Information Fig. S16**). The  
331 CEC/PVCg and PDMS actuators produced remarkably stable displacement profiles. By contrast, apparent

332 displacement shifts were observed over time for PVCg and VHB 4910 actuators. Relative displacement shifts  
 333 (RDS) were calculated to quantify the viscoelastic effects (Fig. 5d). It was found that RDS values increased  
 334 with time, *i.e.* number of actuation cycles, for VHB 4910 and PVCg actuators, while remaining almost constant  
 335 for CEC/PVCg actuators. The relative shifts over 1000 cycles of CEC/PVCg actuators (7.78 % of RDS)  
 336 represented 87 % and 94 % reductions as compared to PVCg (59.40 % of RDS) and VHB 4910 actuators  
 337 (136.09 % of RDS). PDMS actuators (5.70 % of RDS) displayed similar viscoelastic drifts to CEC/PVCg  
 338 actuators.”

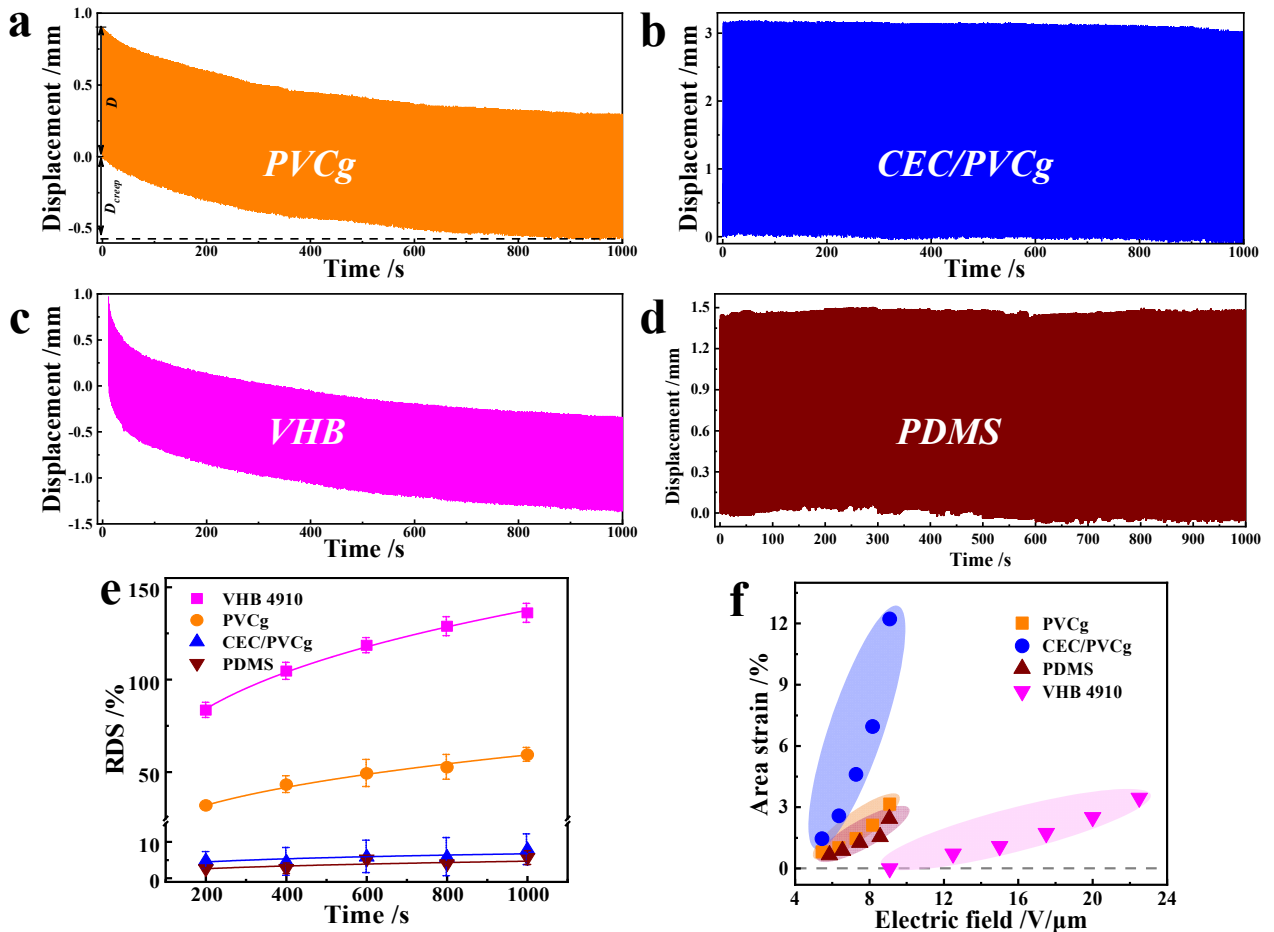

339  
 340 **Fig. R1** Actuation stability and area strains of four types of actuators. Duration tests for the (a) PVCg, (b)  
 341 CEC/PVCg, (c) VHB 4910, and (d) PDMS actuators over 1000 cycles of actuation, *i.e.* 1000 seconds. (e)  
 342 Evolutions of relative displacement shift (RDS) of the four types of actuators. The actuation tests of PVCg,  
 343 CEC/PVCg, and PDMS were performed under 9.09 V/ $\mu$ m electrical field and 1 Hz frequency, while the VHB  
 344 actuator was triggered under 22.5 V/ $\mu$ m electrical field and 1 Hz frequency.  $RDS = \frac{|D - D_{creep}|}{D} \times 100\%$ , where  
 345  $D$  is the amplitude of displacement and  $D_{creep}$  is the shift of the displacement as shown in (a). (f) The mean  
 346 values of area strains that were generated by four types of actuators as functions of driving electric fields.

347  
 348 **COMMENT #2:** The authors have not expressed load in terms of stress, or described in the main text the  
 349 amount of pre-strain used.

350 **Response:** In the evaluation of actuation performance, the elastomer film was carefully coated on a circle  
 351 frame ( $\phi = 50$  mm) to make a concise and facile pump diaphragm. By using an elastic spring as the normal



352 preload, the diaphragm center was pulled down 12 mm each time and the counted area pre-strain was 25 %  
353 according to the spherical crown model shown in **Supplementary Information Fig. S12**. We have now  
354 provided the description of pre-strain in the revised manuscript at Page 20, Paragraph 1 and relevant figure  
355 captions, as shown below:

356 “The initial flection amplitude of 12 mm was generated by using the elastic spring as a pre-load, which  
357 corresponded to a pre-strain of 25 %.”

358

359 *COMMENT #3: There has been substantial work on lowering voltage in dielectric elastomers by increasing*  
360 *dielectric constant, or reducing thickness. Early work on dielectrics was by Kofod I believe, and there has*  
361 *been a lot since, while a number of groups have sought to make thin elastomer layers. This work has not been*  
362 *properly summarized by the authors.*

363 **Response:** Following the reviewer’s suggestions, we have now summarized and discussed the earlier work on  
364 increasing dielectric permittivity and reducing thickness of dielectric elastomers in the revised manuscript at  
365 Page 3, Paragraph 2, as shown below:

366 “Numerous efforts have been devoted to increase the dielectric permittivity and mechanical flexibility to  
367 generate a large actuation under relatively low driving voltages<sup>11-13,16-19</sup>. For instance, the seminal work from  
368 Kofod’s group enhanced the relative permittivity of the PDMS elastomer from 3.0 to 5.9 and decreased the  
369 elastic modulus from 1900 to 550 kPa by grafting small molecules with high dipole moment to the elastomer  
370 matrix, leading to significant improvement of their electromechanical performances<sup>19</sup>. In addition, the  
371 reduction of the film thickness is an alternative method to improve the actuation performance<sup>20-23</sup>. For example,  
372 Shea and his co-workers demonstrated that the actuation strain of 7.5 % could be generated with a 3 μm thick  
373 film under a driving voltage of 245 V<sup>20</sup>. By contrast, it required much higher driving voltage of 3.3 kV to  
374 generate the same actuation strain with the 30 μm thick film. Despite these positive outcomes, thin film  
375 actuators often require complicated fabrication processes and are associated with high prevalence of an  
376 electromechanical instability<sup>24</sup>.”

377

378 *COMMENT #4: The improved sensor response compared to PVC is well presented. It is unclear how this*  
379 *performance compares to that of VHB and silicones.*

380 **Response:** To address the reviewer’s concern, we made PDMS and VHB 4910 based sensors and evaluated  
381 their sensing performances, *i.e.* sensitivity and stability, under the exact same conditions as PVCg and  
382 CEC/PVCg sensors. First, sensitivity tests showed that our CEC/PVCg sensors demonstrated the highest  
383 sensitivity than other sensors, as shown in the following **Fig. R2**. Specifically, the sensitivity (*S*) of CEC/PVCg  
384 sensors were 3.1-fold and 1.5-fold higher than PDMS and VHB 4910 sensors in the displacement ranges of 7-  
385 14 mm, respectively. Second, the stability of sensing performance was evaluated over 1440 cycles of flection  
386 (2.5 s per cycle and 60 min in total), as shown in **Fig. R3**. The profiles of relative capacitance over time (**Fig.**  
387 **R3a-3d**) indicated the stable performance for CEC/PVCg and PDMS sensors while apparent shift over time  
388 for PVCg and VHB 4910 sensors. The relative standard deviation (RSD) of relative capacitances over 1440  
389 cycles was calculated to quantify the stability of their sensing performance (**Fig. R3e**). The results showed that  
390 our CEC/PVCg and PDMS sensors displayed much lower RSD values (5.75 % and 3.67 %), *i.e.* higher stability,  
391 than PVCg (9.84 %) and VHB 4910 (8.20 %) sensors. Altogether, our CEC/PVCg sensors demonstrated the  
392 superior overall sensing performances regarding of high sensitivity and stability over currently existing PVCg,  
393 PDMS, and VHB 4910 sensors. The new data has now been added as **Fig. 6c** and **6e** in the revised manuscript  
394 and **Supplementary Note 5**. The relevant discussion has been added in the revised manuscript at Page 14,  
395 Paragraphs 2 and 3, as shown below:

396 “To demonstrate the sensing application of the CEC/PVCg elastomers, the periodic strain driven by a linear  
 397 reciprocating actuator was applied to the prepared DES devices, including CEC/PVCg, PVCg, PDMS, and  
 398 VHB 4910-based sensors (Fig. 6a and Supplementary Information Fig. S17). The profiles and periods of  
 399 the capacitance signals (output) that were generated from both PVCg and CEC/PVCg sensors were identical  
 400 to the strain signals (input) (Fig. 6b and Supplementary Video S5), suggesting that the mechanical signal can  
 401 be accurately converted into the electric signal by the prepared sensors (Supplementary Note 5). The  
 402 CEC/PVCg sensors showed the fast response time, e.g. 1.0, 0.5, and 0.25 seconds under frequencies of 0.5-2.0  
 403 Hz (Supplementary Information Fig. S19). Notably, the CEC/PVCg sensors generated a significantly higher  
 404 signal/noise ratio, baseline capacitance and capacitance width (i.e.  $\Delta C$ , difference between peak capacitance  
 405  $C$  and baseline capacitance  $C_0$ ) than the PVCg sensors because of the higher permittivity of CEC/PVCg  
 406 matrix<sup>36</sup>. Moreover, the CEC/PVCg sensors showed the highest sensitivity ( $S$ ) among four types of sensors  
 407 that we studied here. For instance, the sensitivity of CEC/PVCg sensors was 3.1-fold, 1.5-fold, and 1.7-fold  
 408 higher than PDMS, VHB 4910, and PVCg sensors, respectively in the displacement range of 7-14 mm (Fig.  
 409 6c and Supplementary Information Fig. S18).”

411 “Notably, the capacitance generated by PVCg and VHB 4910 sensors showed an apparent drift over the  
 412 recording time of 60 min (i.e. 1440 cycles) (Fig. 6d and Supplementary Information Fig. S20), which is in  
 413 line with the previous report<sup>28</sup>. By contrast, CEC/PVCg and PDMS sensors produced remarkably stable  
 414 capacitance signals without visible drift over at least 60 min, which was resulted from the low viscoelasticity  
 415 and the inhibition on the rearrangement of their polar functions by the multiple molecular interactions. The  
 416 relative standard deviation (RSD) of capacitances over 1440 cycles was analyzed to quantify the stability of  
 417 sensors (Fig. 6e). The results showed that our CEC/PVCg and PDMS sensors displayed much lower RSD  
 418 values (5.75 % and 3.67 %) of relative capacitances, i.e. higher stability, than PVCg (9.84 %) and VHB 4910  
 419 (8.2 %) sensors. Altogether, our CEC/PVCg sensors demonstrated the superior overall sensing performances  
 420 regarding of high sensitivity and stability compared to existing PVCg, PDMS, and VHB 4910 sensors.”

421

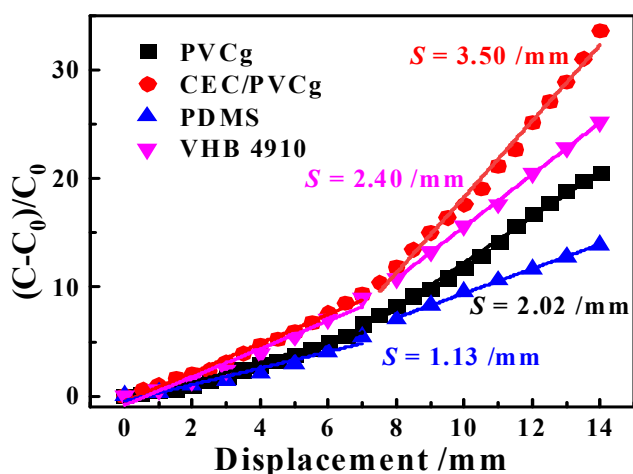

422

423 **Fig. R2** Sensitivity tests. The relative capacitance ( $C-C_0/C_0$ ) that was generated by PVCg, CEC/PVCg, PDMS,  
 424 and VHB 4910 sensors as a function of the displacement. The tangential slope of the curve was defined as the  
 425 sensitivity ( $S$ ) of the sensors. The values of sensitivity in the displacement ranges of 7-14 mm were marked in  
 426 the figure.

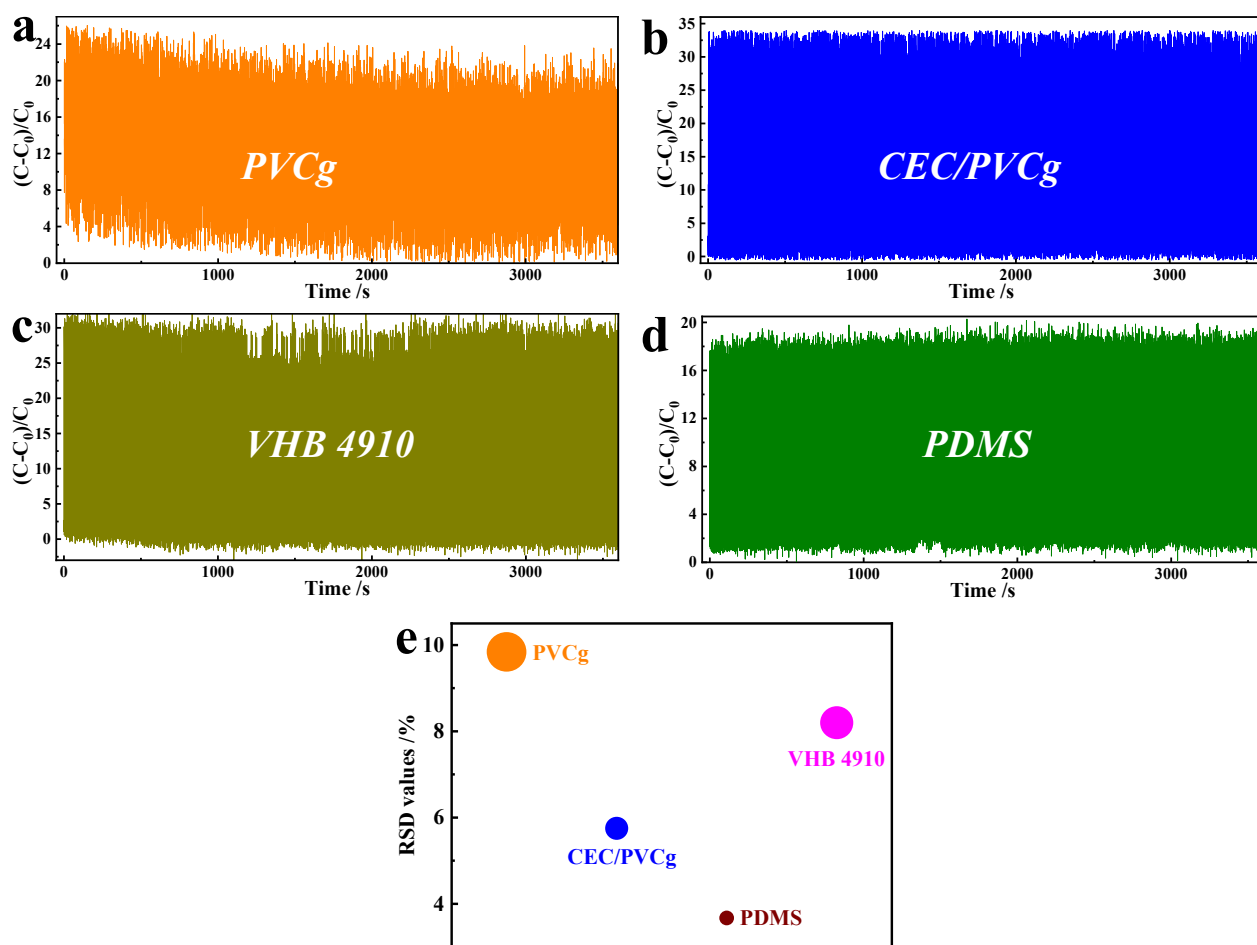

427

428 **Fig. R3** Sensing stability tests. Duration tests within 1440 flexion cycles ( $T = 2.5$  s per cycle and 60 min in  
 429 total) for the (a) PVCg, (b) CEC/PVCg, (c) VHB 4910, and (d) PDMS sensors. (e) The calculated relative  
 430 standard deviation (RSD = standard deviation of relative capacitance / mean of relative capacitance) values of  
 431 four types of sensors.

432

433 **COMMENT #5:** *What is the dielectric loss at typical operating frequencies/timescales - e.g. 1 Hz?*

434 **Response:** We thank the reviewer for bringing up this issue. In the original manuscript, we used an impedance  
 435 analyzer (4294A, Agilent, USA), which is the most commonly used system in the literature [R1-R6], to  
 436 measure the dielectric properties of our elastomers. The testing frequency range of this machine is  $40 \sim 10^7$  Hz.  
 437 Samples cannot be tested at 1 Hz with this machine. To answer the reviewer's question, we tested the dielectric  
 438 properties of our elastomers using a new machine (Concept 80 system, Novocontrol, Germany) in the  
 439 frequency range of  $0.1 \sim 10^7$  Hz. The results showed that the dielectric losses of the CEC/PVCg elastomers with  
 440 0, 1, 9, 17 wt% loading concentrations of CEC were 20.84, 22.98, 22.98, 39.67 @ 1 Hz, and 0.026, 0.031,  
 441 0.031, 0.047 @ 1 kHz, respectively (**Fig. R4**). The dielectric loss is highly frequency dependent, *i.e.* decrease  
 442 at higher frequency, which is in line with previous reports [R9-R12]. In addition, the values of dielectric losses  
 443 at 1 kHz that were measured by traditional machine (4294A, Agilent) and the new machine (Concept 80 system)  
 444 were different, *e.g.* 0.105 vs 0.031 at 1 kHz. Since most previous reports used the traditional machine (4294A,  
 445 Agilent) to measure the dielectric properties at 1 kHz, we kept the original data that were acquired using  
 446 traditional machine (4294A, Agilent) in the revised manuscript in order to have a better comparison to the  
 447 previous literatures and avoid potential confusions.

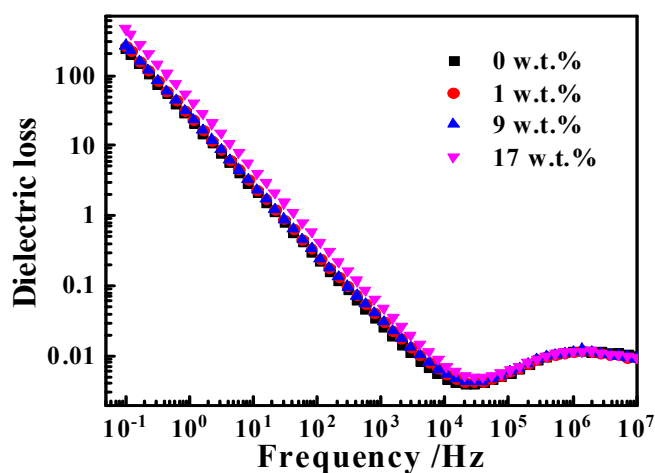

448

449 **Fig. R4** Dielectric losses of the CEC/PVCg elastomers with 0, 1, 9, 17 wt% loading concentrations of CEC  
 450 under frequencies of 0.1-10 MHz, that were measured using the new machine (Concept 80 system).

451

452 *COMMENT #6: It is claimed that the actuators and sensors show fast response. I don't see a frequency  
 453 response or time response analysis, or comparison with other materials.*

454 **Our response:** Most of creep driven actuators, such as high viscoelastic PVCg, take 5-20 seconds to complete  
 455 one actuation cycle [R13-R16]. By contrast, our CEC/PVCg actuators take only 0.2-1 second to finish one  
 456 actuation cycle (as shown in the following **Fig. R5a**). The CEC/PVCg actuators presented a characteristic  
 457 Maxwell field driven actuator, where the flexion amplitude decreases with the increase of frequency.

458 The capacitance sensors always showed a fast response from the previous literature. For instance,  
 459 the capacitive strain sensor reported by Liu's group had a fast response time less than 140 ms [R17]. The  
 460 flexible capacitive pressure sensor reported by Lee and Kim's group showed a response time of 0.578-1.04  
 461 seconds [R18]. **Fig. R5b** recorded typical capacity/frequency curves for the CEC/PVCg elastomers under a  
 462 constant flexion and different driving frequencies, including 0.5, 1.0, and 2.0 Hz. The typical response time  
 463 of our CEC/PVCg sensors are 1.0, 0.5, and 0.25 seconds. In addition, the fast response of our CEC/PVCg  
 464 sensors was also demonstrated by their faithful recording of the leg motion during fast running, where the  
 465 response time is about 0.2 second, as shown in the **Fig. 6i in the manuscript** and **Supplementary Video S6**.

466 We have now added the relationship between the flexion displacement and the driven frequency in  
 467 **Supplementary Note 4**, and relevant discussions in the revised manuscript at Page 11, Paragraph 3 and Page  
 468 14, Paragraph 2 as shown below:

469 *“In addition, the amplitude of flexion displacement of our CEC/PVCg actuators was decreased with the  
 470 increase of the driving frequency with fast response time (0.1-0.5 seconds) (**Supplementary Information Fig.  
 471 S14**), which represented a characteristic electromechanical behavior of Maxwell field driven actuators. By  
 472 contrast, it often took 5-20 seconds per cycle for creep-driven actuators, such as PVCg actuators<sup>26</sup>.”*

473

474 *“The CEC/PVCg sensors showed the fast response time, e.g. 1.0, 0.5, and 0.25 seconds under frequencies of  
 475 0.5-2.0 Hz (**Supplementary Information Fig. S19**).”*

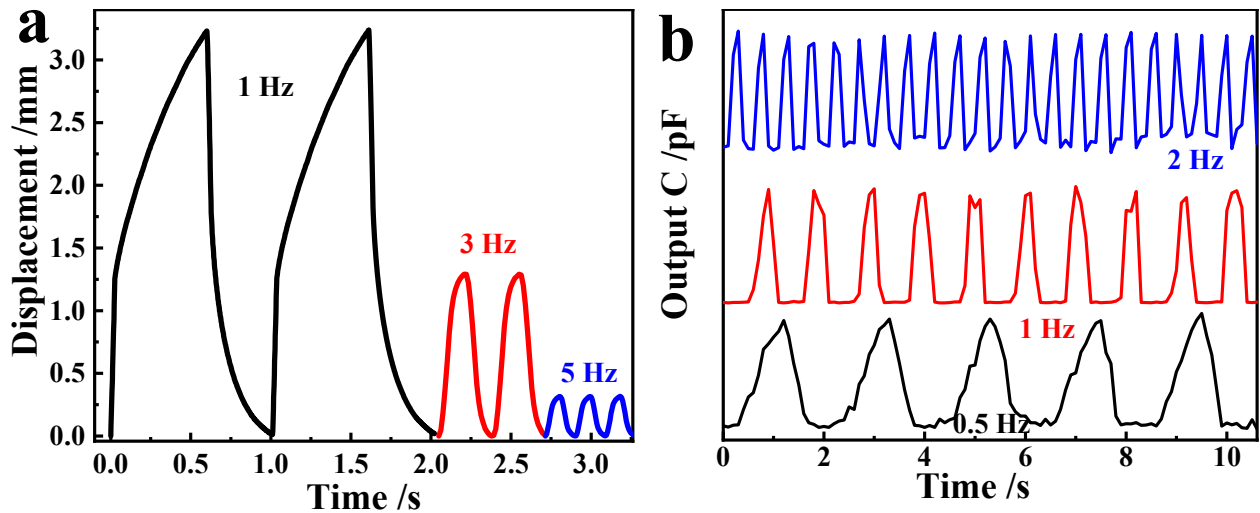

476

477 **Fig. R5** Time response tests. (a) The flextion displacements that were generated by our CEC/PVCg (9 wt%  
 478 CEC) actuators under different driving frequencies and 9.09 V/ $\mu$ m electrical field. (b) The output capacity of  
 479 our CEC/PVCg (9 wt% CEC) sensors under different driving frequencies and 14.0 mm flextion displacement  
 480 (input), which was generated from a commercial linear actuator.

481

482 **COMMENT #7:** *What are the potential drawbacks of the approach? Do we expect a greater temperature*  
 483 *dependence? Is breakdown strength reduced? Can large actuation be achieved, by applying higher voltages*  
 484 *(why did the authors stop at the 9 V/micron)?*

485 **Response:** We thank the reviewer for bringing up these important issues to discuss. A potential limitation of  
 486 current device is the instinct low breakdown strength of the traditional PVCg, which was not improved by the  
 487 addition of the CEC. The major reason is that the small plasticizer molecule *i.e.* DOP would percolate through  
 488 the elastomer and generate the premature breakdown strength. The low breakdown strength limits the use of  
 489 high driving voltage to achieve larger actuation. However, the introduction of CEC in the plasticized PVCg  
 490 significantly increase their permittivity by 2.5 folds while maintaining the similar breakdown strength.  
 491 Therefore, the CEC/PVCg can achieve large actuation under low driving electric field. Another limitation is  
 492 the current film fabrication method, *i.e.* mold casting, which is very straightforward while producing a relative  
 493 thick ( $\sim$ 470  $\mu$ m) film of the dielectric elastomer to ensure the uniformity of the film and large force output.  
 494 The decrease of film thickness would be expected to lower the required driving electric field and increase the  
 495 breakdown strength [R19,R20]. Thus, we are currently working on the fabrication of the thinner film, *e.g.*  $\sim$ 100  
 496  $\mu$ m by using spray coating method, or down to  $\sim$ 50  $\mu$ m by using spinning coating method, in order to further  
 497 improve the actuation performances of our devices under low driving electric field. We have now provided the  
 498 discussion about the limitations of this study in the revised manuscript at Page17, Paragraph 3, as shown below:

499 *“One limitation of current devices is the intrinsic low breakdown strength, *i.e.* 21.79 V/ $\mu$ m, of the traditional*  
 500 *plasticized PVCg, which has not been improved by the addition of CEC in this study. The low breakdown*  
 501 *strength prevents the use of high driving electric field to achieve larger actuation. However, the introduction*  
 502 *of CEC in the plasticized PVCg indeed significantly augmented their actuation by increasing their permittivity*  
 503 *by 2.5 folds while maintaining the similar breakdown strength. Another limitation of this study is that the*  
 504 *current film fabrication method, *i.e.* mold casting, produced a relative thick film ( $\sim$ 470  $\mu$ m) of DEs although*  
 505 *it is very straightforward to use. It has been demonstrated that the decrease of film thickness would lower the*  
 506 *required driving electric field and increase the breakdown strength<sup>51,52</sup>. Therefore, we are currently working*

507 on the fabrication of the thinner film, e.g.  $\sim 100\ \mu\text{m}$  by using spray coating method, or down to  $\sim 50\ \mu\text{m}$  by  
508 using spinning coating method, to further improve the actuation performances of DEAs under low driving  
509 electric field.”

510 For the issue of temperature dependence of DEA/DES, the temperature is an important factor to  
511 consider for its influences on the electromechanical performance, especially when the devices would be used  
512 under environments with large temperature fluctuations. For example, Zhang’s study demonstrated that the  
513 breakdown voltage of VHB 4910 decreased by increasing temperature [R21]. Michel *et al* and Vu-Conga *et al*  
514 reported that the elastic moduli of DEs were significantly decreased at elevated temperature, facilitating the  
515 generation of larger strains [R22,R23]. All the evaluations of this study were performed at room temperature.  
516 The investigation of temperature dependence is needed when our DEA and DES are applied at different  
517 environments in the future. To address the reviewer’s concern, we have added the discussions in the revised  
518 manuscript at Page18, Paragraph 1, as shown below:

519 “In addition, the evaluation of all the actuation and sensing performances of our devices were evaluated under  
520 room temperature. It has been reported that both breakdown strength and elastic modulus of DEs were sensitive  
521 to variations of the temperature depending on materials<sup>53</sup>. The temperature dependence needs to be evaluated  
522 if our DEA and DES are used at different environments in the future.”

523 According to the following performance figures of merit,  $S_z = \epsilon_r \epsilon_0 E^2 / Y$ , a larger actuation strain would  
524 be achieved by increasing the applied electric field. As demonstrated by our results (as shown in the following  
525 **Fig. R6**), the PVCg-based actuators produced 1.7-fold higher area strain by increasing the driving voltage from  
526 9.26 to 19.48 V/ $\mu\text{m}$ . Existing DEAs often requires high driving electrical fields to achieve large strain, which,  
527 however, could lead to the increased risks of polymer creep, current leakage, and electrical breakdown. In  
528 addition, it also needs a bulky, high-voltage power supply system, hampering its wide-spread applications  
529 [R24]. Therefore, a low driving voltage actuation is preferred for DEAs. In this study, the breakdown strength  
530 of plasticized PVCg was about 20 V/ $\mu\text{m}$ . The introduction of CEC and its loading concentration have limited  
531 impacts on the breakdown strength while it dramatically increased permittivity. Thus, a relative low working  
532 voltage of 9.09 V/ $\mu\text{m}$  was selected in order to prolong the working life of the device, achieve a stable  
533 performance while generating a desired large area strain [R25-R28]. Notably, such strain of 12.22 % was  
534 achieved under a very small pre-strain of 25 %, which was negligible when compared to other pre-strains such  
535 as 540 % and 400 % [R29, R30]. To address the reviewer’s comments, we have added the relevant discussions  
536 in the revised manuscript at Page 8, Paragraph1, as shown below:

537 “Importantly, the breakdown strength was only slightly decreased by 10.4 % following the addition of CEC  
538 and kept almost constant for CEC/PVCg elastomers with different loading concentrations of CEC (**Fig. 3c** and  
539 **Supplementary Information Fig. S4**). The detected breakdown strength of CEC/PVCg elastomers with 9 wt%  
540 CEC was 19.53 V/ $\mu\text{m}$ . Thus, a much lower driving electric field of 9.09 V/ $\mu\text{m}$  was used in all of experiments  
541 in this study in order to prolong the working life of device and achieve a stable performance while generating  
542 a desired large area strain.”

543



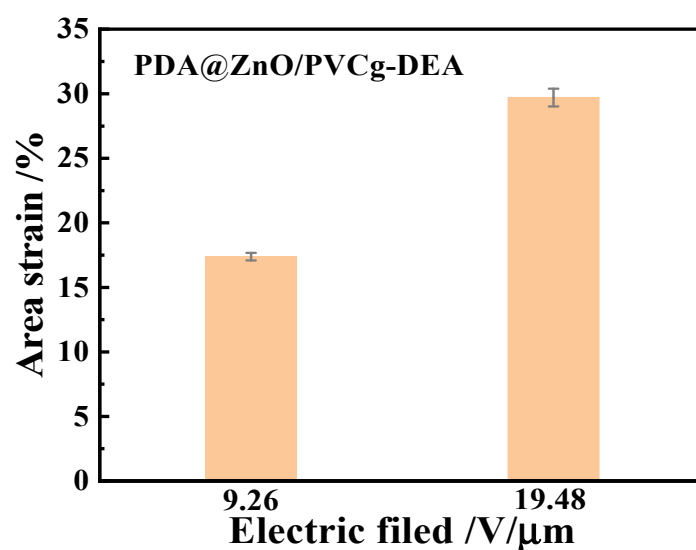

544

545 **Fig. R6** Actuation strains of the dopamine (PDA) coating ZnO particles hybrid PVCg (PDA@ZnO/PVCg)  
 546 actuators under driving electrical fields of 9.26 and 19.48 V/μm.

547

548 *COMMENT #8: The sensor work is well presented. It is important to put this work put in context of other*  
 549 *capacitive sensor work, and perhaps provide some detail in the supplementary. There are also commercial*  
 550 *sensors (e.g. Stretchesense) to compare with.*

551 **Response:** We thank the reviewer for her/his great suggestion. We have now compared our CEC/PVCg sensors  
 552 with three different types of currently existing sensors, as shown in the following **Table R1**. One of the major  
 553 drawbacks of existing sensors is that they cannot achieve high sensitivity over a wide range of deformation.  
 554 For instance, the commercial strain gauge sensor has a very high sensitivity, but it was limited to a narrow  
 555 range of distance *e.g.* 0-0.12 mm [R31]. By contrast, Our CEC/PVCg sensors can achieve a high sensitivity of  
 556 3.08 pF/mm over a much wider range of deformation, *i.e.* 0-14 mm. In addition, the relative high sensitivity  
 557 of existing sensors has been heavily relying on the sophisticated structural design and micro/nano-  
 558 manufacturing technologies [R32], such as micro-electromechanical systems (MEMS), resulting in the high  
 559 complexity and high cost. By contrast, our CEC/PVCg sensor was fabricated by a simple mold-casting method  
 560 and it costs ~ \$ 2.00 per sensor. To address the reviewer’s comment, we have added the following Table with  
 561 new data as **Supplementary Table. S3** to compare our DEA against other commercially available sensors and  
 562 relevant discussions in the revised manuscript at Page15, Paragraph 2, as shown below:

563 *“In addition, our CEC/PVCg sensors showed a high sensitivity in a wide range of deformation, which cannot*  
 564 *be achieved with commercially available sensors (Supplementary Table S3). The high sensitivity of existing*  
 565 *commercial sensors has been heavily relying on the sophisticated and complex design of their structures, which*  
 566 *requires the costly and time-consuming micro-/nano-manufacturing techniques, such as micro-*  
 567 *electromechanical systems (MEMS). By contrast, our CEC/PVCg sensors were fabricated by a very simple*  
 568 *and highly accessible mold-casting method with an estimated cost of ~ \$ 2.00 per sensor.”*

569

570

571

572

573

574



575  
576

**Table R1** Comparison of magnetic, strain, and capacitive sensors

|                     | Magnetic sensors <sup>[R31]</sup> | Strain gauge sensors <sup>[R33]</sup> | Capacitive sensor <sup>[R31]</sup> | CEC/PVCg Sensor          |
|---------------------|-----------------------------------|---------------------------------------|------------------------------------|--------------------------|
| Stiffness           | Rigid                             | Flexible                              | Flexible and stretchable           | Flexible and stretchable |
| Range               | 100nm-70mm                        | 0-0.12 mm                             | 10nm-10 $\mu$ m                    | 0-14 mm                  |
| Sensitivity         | 1.68 V/mm                         | Very high                             | 0.038-5.3 pF/mm                    | 3.08 pF/mm               |
| Linearity ( $R^2$ ) | 0.9994                            | 0.98-0.99                             | 0.97-0.9975                        | 0.988-0.992              |
| Cost                | Expensive                         | Expensive                             | Moderate                           | Cheap                    |
| Complexity          | Complex                           | Complex                               | Complex                            | Simple                   |

577  
578  
579  
580  
581  
582  
583  
584  
585  
586  
587  
588  
589  
590  
591  
592  
593  
594  
595  
596  
597  
598  
599  
600  
601  
602  
603  
604  
605  
606  
607  
608  
609

610 **References**

- 611 [R1] You, I. et al. Artificial multimodal receptors based on ion relaxation dynamics. *Science* **370**, 961-965  
612 (2020).
- 613 [R2] Kim, P. et al. High energy density nanocomposites based on surface-modified BaTiO<sub>3</sub> and a ferroelectric  
614 polymer. *ACS Nano* **3**, 2581-2592 (2009).
- 615 [R3] Shao, J. et al. A novel high dielectric constant acrylic resin elastomer nanocomposite with pendant  
616 oligoanilines. *Compos. B. Eng.* **176**, 107216 (2019).
- 617 [R4] Fook, T. H. T., Jeon, J. Han. & Lee, P. S. Transparent flexible polymer actuator with enhanced Output  
618 force enabled by conductive nanowires interlayer. *Adv. Mater. Technol.* **5**, 1900762 (2019).
- 619 [R5] Xiong, Y. X. et al. A flexible, ultra-highly sensitive and stable capacitive pressure sensor with convex  
620 microarrays for motion and health monitoring. *Nano Energy* **70**, 104436 (2020).
- 621 [R6] Zhang, L., Song, F. L., Lin, X. & Wang, D. R. High-dielectric-permittivity silicone rubbers incorporated  
622 with polydopamine-modified ceramics and their potential application as dielectric elastomer generator.  
623 *Mater. Chem. Phys.* **241**, 122373 (2020).
- 624 [R7] Shi, Y. et al. A processable, high-performance dielectric elastomer and multilayering process. *Science*  
625 **377**, 228-232 (2022).
- 626 [R8] Sheima, Y., Caspari, P. & Opris, D. M. Artificial muscles: dielectric elastomers responsive to low  
627 voltages. *Macromol. Rapid Commun.* **40**, 1900205 (2019).
- 628 [R9] Elkholly, M. M. & El-Deen, L. M. S. The dielectric properties of TeO<sub>2</sub>-P<sub>2</sub>O<sub>5</sub> glasses. *Mater. Chem. Phys.*  
629 **65**, 192-196 (2000).
- 630 [R10] Ning, N. Y. et al. Tailoring dielectric and actuated properties of elastomer composites by bioinspired  
631 poly(dopamine) encapsulated graphene oxide. *ACS Appl. Mater. Interfaces* **7**, 10755-10762 (2015).
- 632 [R11] Yang, D. et al. Enhancement of dielectric performance of polymer composites via constructing BaTiO<sub>3</sub>-  
633 poly(dopamine)-Ag nanoparticles through mussel-inspired surface functionalization. *ACS Omega* **3**,  
634 14087-14096 (2018).
- 635 [R12] Guo, Y. T. et al. Microstructure and dielectric properties of sub-micron hollow sphere  
636 (Ba<sub>0.6</sub>Sr<sub>0.4</sub>)TiO<sub>3</sub>/PVDF composites. *IET Nanodielectrics* **2**, 135-141 (2019).
- 637 [R13] Asaka, K. & Hashimoto, M. Effect of ionic liquids as additives for improving the performance of  
638 plasticized PVC gel actuators. *Smart Mater. Struct.* **29**, 025003 (2020).
- 639 [R14] Hwang, T., Frank, Z., Neubauer, J. & Kim, K. J. High-performance polyvinyl chloride gel artificial  
640 muscle actuator with graphene oxide and plasticizer. *Sci. Rep.* **9**, 9658 (2019).
- 641 [R15] Hirai, T., Zheng, J., Watanabe, M., Shirai, H. & Yamaguchi, M. Electroactive nonionic polymer gel  
642 swift bending and crawling motion. *Mat. Res. Soc. Symp. Proc.* **600**, 267-272 (1999).
- 643 [R16] Li, Y. & Hashimoto, M. PVC gel based artificial muscles: Characterizations and actuation modular  
644 constructions. *Sens. Actuators A: Phys.* **233**, 246-258 (2015).
- 645 [R17] Dong, T. Y., Gu, Y., Liu, T. & Pecht, M. Resistive and capacitive strain sensors based on customized  
646 compliant electrode: Comparison and their wearable applications. *Sensor. Actuat. A Phys.* **326**, 112720  
647 (2021).
- 648 [R18] Beak, S. et al. Flexible piezocapacitive sensors based on wrinkled microstructures: toward low-cost  
649 fabrication of pressure sensors over large areas. *RSC Adv.* **7**, 39420 (2017).
- 650 [R19] Huang, J. S., Shian, S., Diebold, R. M., Suo, Z. G., & Clarke, D. R. The thickness and stretch dependence  
651 of the electrical breakdown strength of an acrylic dielectric elastomer. *Appl. Phys. Lett.* **101**, 122905  
652 (2012).

- 653 [R20] Gatti, D. et al. The dielectric breakdown limit of silicone dielectric elastomer actuators. *Appl. Phys. Lett.*  
654 **104**, 052905 (2014).
- 655 [R21] Zhang, J. S. et al. Temperature effect on electromechanical properties of polyacrylic dielectric elastomer:  
656 an experimental study. *Smart Mater. Struct.* **29**, 047002 (2020).
- 657 [R22] Michel, S., Zhang, X. Q., Wissler, M., Löwe, C. & Kovacs, G. A comparison between silicone and  
658 acrylic elastomers as dielectric materials in electroactive polymer actuators. *Polym. Int.* **59**, 391-399  
659 (2010).
- 660 [R23] Vu-Conga, T., Jean-Mistral, C. & Sylvester, A. New operating limits for applications with electroactive  
661 elastomer: effect of the drift of the dielectric permittivity and the electrical breakdown *Proc. SPIE* **8687**,  
662 86871S (2013).
- 663 [R24] Chen, Z. Q. et al. Ultrasoft-yet-strong pentablock copolymer as dielectric elastomer highly responsive  
664 to low voltages. *Chemical Engineering Journal. Chem. Eng. J.* **405**, 126634 (2021).
- 665 [R25] Yin, L. J. et al. Soft, tough, and fast polyacrylate dielectric elastomer for non-magnetic motor. *Nat.*  
666 *Commun.* **12**, 4517 (2021).
- 667 [R26] Shankar, R., Ghosh, T. K. & Spontak, R. J. Electromechanical response of nanostructured polymer  
668 systems with no mechanical pre-strain. *Macromol. Rapid Commun.* **28**, 1142-1147 (2007).
- 669 [R27] Zhao, Y. et al. Remarkable electrically actuation performance in advanced acrylic-based dielectric  
670 elastomers without pre-strain at very low driving electric field. *Polymer* **137**, 269-275 (2018).
- 671 [R28] Yang, C. X., Gao, X. & Luo, Y. W. End-block-curing ABA triblock copolymer towards dielectric  
672 elastomers with both high electro-mechanical performance and excellent mechanical properties. *Chem.*  
673 *Eng. J.* **382**, 123037 (2020).
- 674 [R29] Pelrine, R., Kornbluh, R., Pei, Q. B. & Joseph, J. High-speed electrically actuated elastomers with strain  
675 greater than 100%. *Science* **287**, 836-845 (2000).
- 676 [R30] Huang, J. S. et al. Giant, voltage-actuated deformation of a dielectric elastomer under dead load. *Appl.*  
677 *Phys. Lett.* **100**, 041911 (2012).
- 678 [R31] Stefanov, A. Z., Zivanov, L. D., Kistic, M. G. & Menicanin, A. B. Fully FFF-printed capacitive  
679 displacement sensor based on graphene/PLA composite and thermoplastic elastomer filaments. *IEEE Sens.*  
680 *J.* **22**, 10437-10445 (2022).
- 681 [R32] Ruth, S. R. A. et al. Rational design of capacitive pressure sensors based on pyramidal microstructures  
682 for specialized monitoring of biosignals. *Adv. Funct. Mater.* **30**, 1903100 (2020).
- 683 [R33] Araromi, O. A. et al. Ultra-sensitive and resilient compliant strain gauges for soft machines. *Nature* **587**,  
684 219 (2020).
- 685
- 686

687 **Response to Reviewer #3:**

688 We thank the reviewer for her/his constructive comment. We are delighted that the reviewer found “*the*  
689 *physicochemical and electromechanical coupling property of the as-synthesized CEC/PVC were carefully*  
690 *studied*” and “*This work improved the performance of traditional PVC.*” Here we address the comments and  
691 technical questions raised by the reviewer with new experimental results and analyses.

692

693 **COMMENT #1:** *However, the demonstrated performance of actuation and sensing of the presented material*  
694 *are not convincing to me. The paper cannot meet the standard of Nature Communications unless the authors*  
695 *could clarify the advantage of the material compared to the existing material.*

696 **Response:** To address reviewer’s concern, we have prepared the actuators and sensors using the most  
697 commonly used dielectric elastomers, *i.e.* PDMS and VHB 4910, and made a direct comparison of actuation  
698 and sensing performances between theirs and our CEC/PVCg. For actuation performance, the generated area  
699 strains of four types of actuators under the same pre-strain of 25 % and driving electric fields were first  
700 measured. As shown in the following **Fig. R1a**, our CEC/PVCg actuators produced the largest area strains  
701 among all actuators studied here. Our CEC/PVCg actuators showed 3.9-fold and 5-fold increase in area strain  
702 as compared to PVCg and PDMS actuators, respectively. Specifically, the area strains were 1.46-12.22 % for  
703 the CEC/PVCg actuators under the driving electrical fields of 5.45-9.09 V/ $\mu\text{m}$ , 0.81-3.15 % for the PVCg  
704 actuators under 5.45-9.09 V/ $\mu\text{m}$ , 0.65-2.44 % for the PDMS actuators under 5.85-9.07 V/ $\mu\text{m}$ , while VHB 4910  
705 actuators cannot be activated under the driving electrical field < 12.5 V/ $\mu\text{m}$ , *i.e.* strain of 0 %. The area strains  
706 of VHB 4910 actuators were 0.72-3.45 % when the driving electrical field was further increased to 12.5-22.5  
707 V/ $\mu\text{m}$ . Second, the actuation stability of actuators was evaluated by recording the displacements over 1000  
708 cycles, *i.e.* 1000 seconds, and analyzing their relative displacement shifts (RDS) to quantify the stability. As  
709 shown in the following **Fig. R1b**, the RDS values of VHB 4910, PDMS, PVCg, and CEC/PVCg actuators over  
710 1000 cycles were 136.09 %, 5.70 %, 59.40 %, and 7.78 %, respectively. Our CEC/PVCg actuators showed a  
711 very low shift of displacement, which was 94 % and 87 % reductions as compared to VHB 4910 and PVCg  
712 actuators. Therefore, our CEC/PVCg actuators in this study produced the largest actuation strain with the  
713 extremely low viscoelastic effects, demonstrating the significant improvements in actuation performances as  
714 compared to the existing DEAs, such as PDMS and VHB 4190.

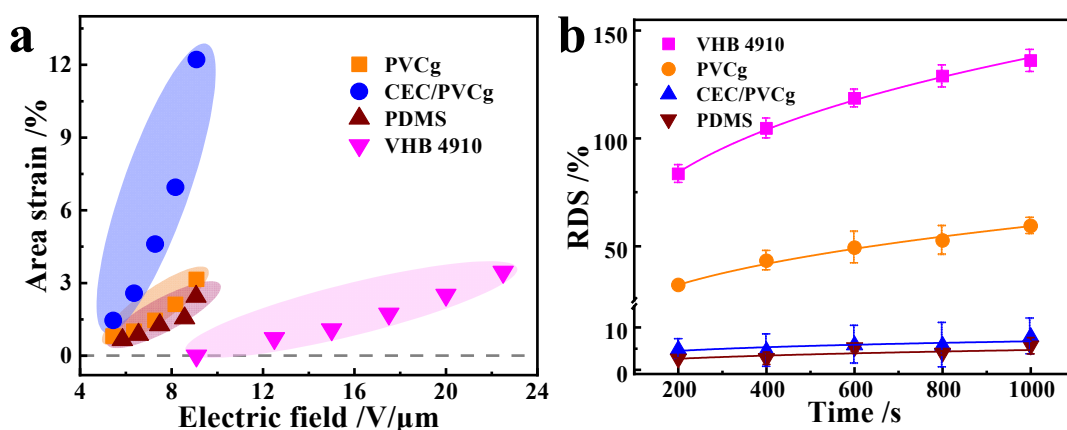

715

716 **Fig. R1** The actuation performances of CEC/PVCg actuators as compared to existing PVCg, PDMS, and VHB  
717 4910 actuators as measured by area strain (mean values) and actuation stability through the quantification of  
718 the relative displacement shift (RDS) over different number of cycles or seconds (1 second per cycle). The

719 RDSs were calculated by the following equation  $RDS = \frac{|D - D_{creep}|}{D} \times 100\%$ , where  $D$  is the amplitude of  
 720 displacement and  $D_{creep}$  is the shift of the displacement.

721 For sensing performance (**Fig. R2**), the sensitivity of four types of sensors was first measured by  
 722 calculating the slope of relative capacitance (output) as functions of displacement (input). As shown in **Fig.**  
 723 **R2a**, our CEC/PVCg sensors demonstrated the highest sensitivity among all four types of sensors. For instance,  
 724 the sensitivity ( $S$ ) of CEC/PVCg sensors were 3.1-fold and 1.5-fold higher than PDMS and VHB 4910 sensors,  
 725 respectively in the displacement ranges of 7-14 mm. Moreover, the stability of sensing performance was  
 726 evaluated and quantified by analyzing the relative standard deviation (RSD) of relative capacitances over 1440  
 727 cycles of flexion (2.5 s per cycle and 60 min in total), as shown in **Fig. R2b**. The results showed that our  
 728 CEC/PVCg and PDMS sensors displayed much lower RSD values (5.75 % and 3.67 %), *i.e.* higher stability,  
 729 than PVCg (9.84 %) and VHB 4910 (8.20 %) sensors. Altogether, our CEC/PVCg sensors demonstrated the  
 730 superior overall sensing performances regarding of high sensitivity and stability over currently existing PVCg,  
 731 PDMS, and VHB 4910 sensors.

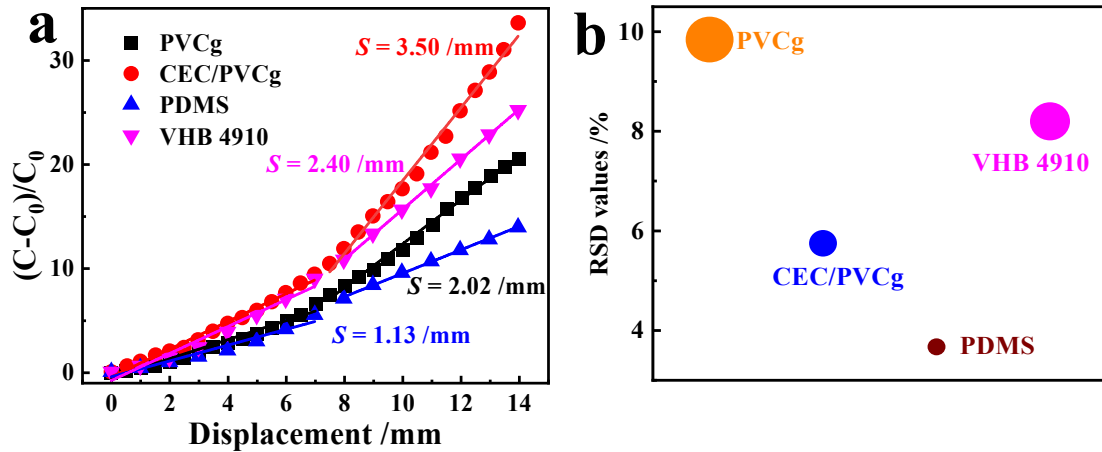

732 **Fig. R2** (a) The relative capacitance ( $(C - C_0)/C_0$ ) that was generated by PVCg, CEC/PVCg, PDMS, and VHB  
 733 4910 sensors as a function of the displacement. The tangential slope of the curve was defined as the sensitivity  
 734 ( $S$ ) of the sensors. The values of sensitivity in the displacement ranges of 7-14 mm were marked in the figure.  
 735 (b) The relative standard deviation (RSD) of relative capacitances over 1440 cycles of flexion ( $T = 2.5$  s per  
 736 cycle and 60 min in total).  $RSD = \text{standard deviation of relative capacitance change} / \text{mean of relative}$   
 737  $\text{capacitance change}$ .  
 738

739  
 740 In summary, it is fair to make a conclusion that the CEC/PVCg dielectric elastomers developed in  
 741 this study demonstrated the significant advantages over currently existing materials, *e.g.* PDMS and VHB 4910,  
 742 for both actuation and sensing applications. We have now provided these new data and discussions in the  
 743 revised manuscript at Page 11, Paragraph 3 as shown below:

744 “According to the strain model shown in **Supplementary Information Fig. S12**, the counted area strain  
 745 generated by the CEC/PVCg actuators was 12.22 % (with 9 wt% CEC, under driving voltage of 9.09 V/ $\mu\text{m}$ ,  
 746 pre-strain of 25 %), which represents 3.9-fold increase as compared to the PVCg actuators (**Fig. 5b**). In addition,  
 747 we prepared the commonly used PDMS and VHB-based actuators and measured their actuation strains under  
 748 the same conditions as the comparison (**Fig. 5b, Supplementary Table S2, and Supplementary Information**  
 749 **Fig. S15**). PDMS actuators produced strains of 0.65-2.44 % under electrical fields of 5.85-9.07 V/ $\mu\text{m}$ . VHB  
 750 4910 actuators could not be triggered, *i.e.* 0 % area strain, under electrical fields < 12.5 V/ $\mu\text{m}$  and produced

751 only 0.72-3.45 % strains by further increasing electrical fields to 12.5-22.5 V/ $\mu\text{m}$ . Therefore, our CEC/PVCg  
752 actuators generated significantly larger actuation strains, *i.e.* > 5 times, than commonly used PDMS and VHB  
753 4910 actuators, which was largely attributed to the augmentation of the electromechanical coupling sensitivity  
754  $k$  of CEC/PVCg (**Fig. 3e**). In addition, the amplitude of flexion displacement of our CEC/PVCg actuators was  
755 decreased with the increase of the driving frequency with fast response time (0.1-0.5 seconds)  
756 (**Supplementary Information Fig. S14**), which represented a characteristic electromechanical behavior of  
757 Maxwell field driven actuators. By contrast, it often took 5-20 seconds per cycle for creep-driven actuators,  
758 such as PVCg actuators<sup>26</sup>.”

759  
760 Page 12, Paragraph 2, as shown below:

761 “The displacements of the PVCg, CEC/PVCg, PDMS, and VHB 4910 actuators were measured and recorded  
762 over actuation for 1000 cycles, *i.e.* 1000 seconds (**Fig. 5c** and **Supplementary Information Fig. S16**). The  
763 CEC/PVCg and PDMS actuators produced remarkably stable displacement profiles. By contrast, apparent  
764 displacement shifts were observed over time for PVCg and VHB 4910 actuators. Relative displacement shifts  
765 (RDS) were calculated to quantify the viscoelastic effects (**Fig. 5d**). It was found that RDS values increased  
766 with time, *i.e.* number of actuation cycles, for VHB 4910 and PVCg actuators, while remaining almost constant  
767 for CEC/PVCg actuators. The relative shifts over 1000 cycles of CEC/PVCg actuators (7.78 % of RDS)  
768 represented 87 % and 94 % reductions as compared to PVCg (59.40 % of RDS) and VHB 4910 actuators  
769 (136.09 % of RDS). PDMS actuators (5.70 % of RDS) displayed similar viscoelastic drifts to CEC/PVCg  
770 actuators.”

771  
772 Page 14, Paragraph 2, as shown below:

773 “To demonstrate the sensing application of the CEC/PVCg elastomers, the periodic strain driven by a linear  
774 reciprocating actuator was applied to the prepared DES devices, including CEC/PVCg, PVCg, PDMS, and  
775 VHB 4910-based sensors (**Fig. 6a** and **Supplementary Information Fig. S17**). The profiles and periods of  
776 the capacitance signals (output) that were generated from both PVCg and CEC/PVCg sensors were identical  
777 to the strain signals (input) (**Fig. 6b** and **Supplementary Video S5**), suggesting that the mechanical signal can  
778 be accurately converted into the electric signal by the prepared sensors (**Supplementary Note 5**). The  
779 CEC/PVCg sensors showed the fast response time, *e.g.* 1.0, 0.5, and 0.25 seconds under frequencies of 0.5-2.0  
780 Hz (**Supplementary Information Fig. S19**). Notably, the CEC/PVCg sensors generated a significantly higher  
781 signal/noise ratio, baseline capacitance and capacitance width (*i.e.*  $\Delta C$ , difference between peak capacitance  
782  $C$  and baseline capacitance  $C_0$ ) than the PVCg sensors because of the higher permittivity of CEC/PVCg  
783 matrix<sup>36</sup>. Moreover, the CEC/PVCg sensors showed the highest sensitivity ( $S$ ) among four types of sensors  
784 that we studied here. For instance, the sensitivity of CEC/PVCg sensors was 3.1-fold, 1.5-fold, and 1.7-fold  
785 higher than PDMS, VHB 4910, and PVCg sensors, respectively in the displacement range of 7-14 mm (**Fig.**  
786 **6c** and **Supplementary Information Fig. S18**).”

787  
788 Page 14, Paragraph 3, as shown below:

789 “Notably, the capacitance generated by PVCg and VHB 4910 sensors showed an apparent drift over the  
790 recording time of 60 min (*i.e.* 1440 cycles) (**Fig. 6d** and **Supplementary Information Fig. S20**), which is in  
791 line with the previous report<sup>28</sup>. By contrast, CEC/PVCg and PDMS sensors produced remarkably stable  
792 capacitance signals without visible drift over at least 60 min, which was resulted from the low viscoelasticity  
793 and the inhibition on the rearrangement of their polar functions by the multiple molecular interactions. The

794 relative standard deviation (RSD) of capacitances over 1440 cycles was analyzed to quantify the stability of  
795 sensors (**Fig. 6e**). The results showed that our CEC/PVCg and PDMS sensors displayed much lower RSD  
796 values (5.75 % and 3.67 %) of relative capacitances, *i.e.* higher stability, than PVCg (9.84 %) and VHB 4910  
797 (8.2 %) sensors. Altogether, our CEC/PVCg sensors demonstrated the superior overall sensing performances  
798 regarding of high sensitivity and stability compared to existing PVCg, PDMS, and VHB 4910 sensors.”

799  
800 **COMMENT #2:** *The strategy of increasing permittivity and reducing viscosity in the material synthesis part*  
801 *sounds reasonable and interesting. However, if the material is aimed to serve for dielectric elastomer*  
802 *applications, these two indexes are apparently not dominated material properties.*

803 **Response:** There are two major factors in materials properties of dielectric elastomers (DEs), *i.e.* permittivity  
804 and mechanical properties, which are critical for their actuation and sensing applications according to the  
805 following performance figures of merits:

$$\text{Actuation strain: } S_z = -\frac{\epsilon_0 \epsilon_r E^2}{Y} = -kE^2$$

$$\text{Sensing Capacitance : } C = \frac{\epsilon_0 \epsilon_r A}{d}$$

806  
807  
808 Where  $\epsilon_0$  and  $\epsilon_r$  are the permittivity of free space and the relative permittivity of the elastomer  
809 matrix, respectively,  $Y$  is the Young's modulus,  $E$  is the applied electrical field,  $d$  is the thickness of the matrix  
810 film,  $k$  is electromechanical coupling sensitivity ( $\epsilon/Y$ ), and  $A$  is the area of electrodes.

811 Numerous studies have proposed and demonstrated that increasing dielectric permittivity and  
812 mechanical flexibility of DE matrix are critical and very effective strategies to improve their actuation and  
813 sensing performances [R1-R5]. For actuation applications, Pei *et al* reviewed materials innovations and  
814 technological progress of DEAs, and concluded that “a high-performance DE should have sufficiently high  
815 elastic strains, a large dielectric permittivity, high dielectric strength, and an actuation stability without  
816 premature failure [R6,R7]”. For example, the acrylate copolymer containing 4 vol% Al nanoparticles has a  
817 high dielectric permittivity of 8.4, which was increased by 78 % compared to the pure acrylate polymer, leading  
818 to significant increase in their breakdown strength and actuation pressure [R8]. Recently, Opris and co-workers  
819 successfully increased the dielectric permittivity of PDMS up to 18 by introducing the dipolar cyan group in  
820 PDMS precursor, which leads to an actuation strain of 5.4 % at very low electric field of 3.2 V/ $\mu\text{m}$  [R9]. For  
821 sensing applications, the magnitude of output capacitance is proportional to the dielectric permittivity of the  
822 elastomer [R5]. Increase of the DE permittivity would enlarge the magnitude of detected capacitance, resulting  
823 in higher signal/noise ratio and sensitivity.

824 On the other hand, existing methods, such as the introduction of plasticizer into DEs, for lowering  
825 the Young's moduli and increasing flexibility of DEs are often associated with the increase of viscoelastic  
826 effects. High viscoelastic effects of DEs would result in evident mechanical loss, stress relaxation, and  
827 viscoelastic hysteresis, leading to instability of output signals over time as well as delayed response [R10,R11].  
828 For instance, the creep-driven PVCg actuators showed more frequent strain drifts and the delayed  
829 electromechanical response as compared to actuators that are primarily driven by the Maxwell field [R12]. As  
830 a sensor, the viscoelastic PVCg are often associated with a large signal shift of bulk permittivity and output  
831 signals over time because of the random rearrangement of polar groups of PVC chain during stretching [R5].  
832 However, such detrimental impacts of high viscoelasticity have been overlooked in the filed for long time.

833 In this study, it was found that the introduction of CEC into the commonly used PVCg elastomers  
834 not only significantly increased the dielectric permittivity, leading to dramatic enhancement of actuation strain  
835 and sensitivity, but also effectively mitigated their viscoelastic effects, resulting in highly stable actuation and



836 sensing performance over long time. Importantly, we have demonstrated the superior performance of our  
837 CEC/PVCg-based DEA and DES in both actuation and sensing as compared to existing and commonly used  
838 PDMS and VHB 4910-based actuators (**Fig. R1**) and sensors (**Fig. R2**). Altogether, we believe the concurrent  
839 increase of dielectric permittivity and reduction of viscoelastic effects of DEs are critical and effective strategy  
840 for the improvement of DE in actuation and sensing applications.

841 To address the reviewer's concern, we have now provided our new data about the direct comparison  
842 of actuation and sensing performances between our CEC/PVCg and commonly used dielectric elastomers, *e.g.*  
843 PDMS and VHB 4910, which directly demonstrated the efficiency of our strategy, in the revised manuscript  
844 as **Fig. 5b**, **5d**, and **Fig. 6c**, **6e**. We have also stressed the importance of increasing dielectric permittivity and  
845 reducing viscoelasticity in DEA and DES applications by adding more discussion in the revised manuscript,  
846 at Page 3, Paragraph 2 and Page 4, Paragraph 2, as shown below:

847

848 “Numerous efforts have been devoted to increase the dielectric permittivity and mechanical flexibility to  
849 generate a large actuation under relatively low driving voltages<sup>11-13,16-19</sup>. For instance, the seminal work from  
850 Kofod's group enhanced the relative permittivity of the PDMS elastomer from 3.0 to 5.9 and decreased the  
851 elastic modulus from 1900 to 550 kPa by grafting small molecules with high dipole moment to the elastomer  
852 matrix, leading to significant improvement of their electromechanical performances<sup>19</sup>. In addition, the  
853 reduction of the film thickness is an alternative method to improve the actuation performance<sup>20-23</sup>. For example,  
854 Shea and his co-workers demonstrated that the actuation strain of 7.5 % could be generated with a 3  $\mu\text{m}$  thick  
855 film under a driving voltage of 245 V<sup>20</sup>. By contrast, it required much higher driving voltage of 3.3 kV to  
856 generate the same actuation strain with the 30  $\mu\text{m}$  thick film. Despite these positive outcomes, thin film  
857 actuators often require complicated fabrication processes and are associated with high prevalence of an  
858 electromechanical instability<sup>24</sup>.”

859

860 “Notably, such viscoelastic effects are widely presented in other elastomers such as VHB<sup>12,32</sup>, polyurethane  
861 (PU)<sup>33</sup>, and polyurethane acrylate (PUA)<sup>34</sup>. Although the creep could be utilized to trigger different  
862 mechanisms of deformation, such as bending, contracting, and crawling, it results in evident mechanical loss,  
863 stress relaxation, and viscoelastic hysteresis, leading to instability of output signals over time as well as delayed  
864 response<sup>35</sup>. For instance, the creep-driven PVCg actuators<sup>25</sup> show more frequent jump of output signals and  
865 the delayed electromechanical response as compared to actuators that are primarily driven by the Maxwell  
866 force. The viscoelasticity of PVCg sensors often leads to a large drift of bulk permittivity and output signals  
867 over time because of the random rearrangement of polar groups of PVC chain during stretching<sup>36</sup>. However,  
868 the viscoelastic effects of PVCg-based DEs have been largely over-looked. The mitigation of their viscoelastic  
869 effects without compromising their electromechanical functions remains warranted.”

870

871 **COMMENT #3:** *As shown in Fig. 5, the actuation strain of the new material falls within the order of 10 %. A*  
872 *lot of existing studies have shown that various of materials without careful optimization and complicated*  
873 *synthesis can easily achieve this actuation level. Similar concerns apply for the sensing demo in this work.*

874 **Response:** For actuation applications, the generated actuation strains can have very large differences when  
875 they are measured under different settings, *e.g.* different driving electric fields and pre-strains. The large area  
876 strains often require high driving electric fields and large pre-strains. For instance, the commercial VHB  
877 elastomer generated area strain of 215 % under very high electrical field of 239 V/ $\mu\text{m}$  and large pre-strain of  
878 540 % [R13] while producing much smaller area strain of 34 % under electrical field of 70 V/ $\mu\text{m}$  and pre-  
879 strain of 400 % [R14]. However, the high driving electric field (> 20 V/ $\mu\text{m}$ ) could lead to the high risks of  
880 current leakage [R15] and electrical breakdown [R16]. In addition, a high value of several kilovolts arises

881 safety issues and brings about the problem of using a bulky high-voltage power supply system [R17]. The  
882 generation of large pre-strains can add extra complexity in the fabrication process of devices, reduce the  
883 reproducibility, and increase risks of mechanical damage of the films. Therefore, the generation of large  
884 actuation under low driving electric field and pre-strain is highly desirable for DEA application while it has  
885 been a long-standing challenge. In this study, we evaluated the actuation performances of actuators under a  
886 low driving electric field of  $9.09 \text{ V}/\mu\text{m}$  and a small pre-strain of 25 %, which was negligible when compared  
887 to other actuators [R13,R14]. To address the reviewer's concern, we have fabricated actuators using the most  
888 commonly used dielectric elastomers, including PDMS and VHB 4910, and evaluated their actuation  
889 performance under the same settings as our CEC/PVCg. As shown in **Fig. R1a**, our CEC/PVCg actuators  
890 generated remarkably larger area strains (12.22 %) than PDMS (2.44 %) and VHB 4910 (no area strain, *i.e.*  
891 0 %) actuators under low driving electric field of  $9.09 \text{ V}/\mu\text{m}$  and small pre-strains of 25 %. Notably, VHB  
892 4910 actuators generated only 3.45 % area strain by further increasing the driving electric field to  $22.5 \text{ V}/\mu\text{m}$ .  
893 Moreover, our CEC/PVCg actuators exhibited a low mechanical loss and a high actuation stability due to the  
894 significant mitigation of viscoelastic effects. As shown in the **Fig. R1b**, the VHB 4910 and pristine PVCg  
895 actuators exhibited apparent shifts in displacement over 1000 actuation cycles, while the CEC/PVCg and  
896 PDMS actuators did not show visible shift. The relative displacement shifts (RDS) were calculated over 1000  
897 cycles to quantify their actuation stability. Our CEC/PVCg actuators showed the high actuation stability with  
898 the low RDS value (7.78 % of RDS), which was 87 % and 94 % reductions as compared to PVCg (59.40 % of  
899 RDS) and VHB 4910 actuators (136.09 % of RDS).

900 For sensing applications, we evaluated the sensitivity and stability of output signals of PDMS, VHB  
901 4910, PVCg, and CEC/PVCg sensors under the same conditions to make a direct comparison. As shown in  
902 **Fig. R2** and detailed description in our *responses to the reviewer's COMMENT #1*, our CEC/PVCg sensors  
903 showed the highest sensitivity among all four types of sensors and very stable signal outputs over 1440 cycles  
904 of flexion.

905 Altogether, it is fair to make a conclusion that the CEC/PVCg dielectric elastomers presented in this  
906 study demonstrated the superior performances in both actuation and sensing over currently existing dielectric  
907 elastomers, such as PDMS and VHB acrylic based materials. We have now provided the data of direct  
908 comparisons in actuation and sensing performance among different materials in **Fig. 5** and **Fig. 6** in the revised  
909 manuscript. We also provided the relevant discussions in the revised manuscript at Page 11, Paragraph 3, Page  
910 12, Paragraph 2, Page 14, Paragraph 2, and Page 14, Paragraph 3, which has been shown in *our response to*  
911 *the reviewer's COMMENT #1*.

912  
913 **COMMENT #4:** *In the introduction, the authors pointed out that the VHB material, widely used in literature,*  
914 *has a clear drawback in viscous property. However, the synthesized new material improves its viscous property*  
915 *compared to VHB but significantly sacrifices its ability of large actuation, which, to the reviewer's opinion, is*  
916 *not satisfactory for dielectric elastomer applications.*

917 **Response:** The large actuation strains of VHB materials as reported from previous literature are largely relying  
918 on the use of very high driving electric fields and large pre-strains as applied in the evaluation. For instance,  
919 the commercial VHB elastomer generated area strain of 215 % with very high electrical field of  $239 \text{ V}/\mu\text{m}$  and  
920 large pre-strain of 540 % [R13] while producing much smaller area strain of 34 % with electrical field of  $70$   
921  $\text{V}/\mu\text{m}$  and pre-strain of 400 % [R14]. However, the generation of large actuation under low driving electric  
922 fields and small pre-strains have been highly desirable for DEA applications [R18]. To make a fair comparison  
923 between VHB 4910 and our CEC/PVCg, we have evaluated their actuation performances under the same  
924 settings. As shown in **Fig. R1a**, our CEC/PVCg actuators showed significantly larger actuation strain of 12.22 %

925 than the VHB 4910 actuators with area strain of 0 % under a low driving electric field of 9.09 V/ $\mu\text{m}$  and a  
926 small pre-strain of 25 %. The VHB 4910 actuators produced an area strain of 3.45 % only by further increasing  
927 the driving electric field up to 22.5 V/ $\mu\text{m}$ . Moreover, our CEC/PVCg actuators exhibited a lower mechanical  
928 loss and a higher actuation stability than VHB 4910 actuators due to the significant mitigation of their  
929 viscoelastic effects. As shown in the **Fig. R1b**, the relative displacement shifts (RDS) were analyzed from the  
930 recorded displacement profiles over 1000 cycles to quantify the actuation stability. VHB 4910 actuators  
931 (136.09 % shifts) displayed 18 times higher relative shifts than our CEC/PVCg actuators (7.78 % shifts). In  
932 addition, our CEC/PVCg sensors also showed higher sensitivity and produced much more stable sensing  
933 signals than VHB 4910 sensors (**Fig. R2**). Therefore, we believe these new data fully support our conclusion  
934 that the CEC/PVCg dielectric elastomer in this study exhibited superior performances in both actuation and  
935 sensing over commercially available VHB acrylic elastomers.

936 We have now provided the data of direct comparisons in actuation and sensing performance among  
937 different materials in **Fig. 5** and **Fig. 6** in the revised manuscript. We also provided the relevant discussions in  
938 the revised manuscript at Page 11, Paragraph 3, Page 12, Paragraph 2, Page 14, Paragraph 2, and Page 14,  
939 Paragraph 3, which has been shown in *our response to the reviewer's COMMENT #1*.

940  
941  
942  
943  
944  
945  
946  
947  
948  
949  
950  
951  
952  
953  
954  
955  
956  
957  
958  
959  
960  
961  
962  
963  
964  
965  
966  
967  
968

969  
970  
971  
972  
973  
974  
975  
976  
977  
978  
979  
980  
981  
982  
983  
984  
985  
986  
987  
988  
989  
990  
991  
992  
993  
994  
995  
996  
997  
998  
999  
1000  
1001  
1002  
1003  
1004  
1005  
1006  
1007  
1008

## References

- [R1] Zhang Q. M. et al. An all-organic composite actuator material with a high dielectric constant. *Nature* **419**, 284-287 (2002).
- [R2] Carpi, F., Bauer, S. & De Rossi, D. Stretching dielectric elastomer performance. *Science* **330**, 1759-1761 (2010).
- [R3] Shi, Y. et al. A processable, high-performance dielectric elastomer and multilayering process. *Science* **377**, 228-232 (2022).
- [R4] Romasanta, L. J., Lopez-Manchado, M. A. & Verdejo, R. Increasing the performance of dielectric elastomer actuators: a review from the materials perspective. *Prog. Polym. Sci.* **51**, 188-211 (2015).
- [R5] Chhetry, A., Sharma, S., Yoon, H., Ko, S. & Park, J. Y. Enhanced sensitivity of capacitive pressure and strain sensor based on CaCu<sub>3</sub>Ti<sub>4</sub>O<sub>12</sub> wrapped hybrid sponge for wearable applications. *Adv. Funct. Mater.* **30**, 1910020 (2020).
- [R6] Qiu, Y., Zhang, E., Plamthottam, R. & Pei, Q. B. Dielectric elastomer artificial muscle: materials innovations and device explorations. *Acc. Chem. Res.* **52**, 2, 316-325 (2019).
- [R7] Chen, D. & Pei, Q. B. Electronic muscles and skins: a review of soft sensors and actuators. *Chem. Rev.* **117**, 11239-11268 (2017).
- [R8] Hu, W., Zhang, S. N., Niu, X. F., Liu, C. & Pei, Q. B. An aluminum nanoparticle-acrylate copolymer nanocomposite as a dielectric elastomer with a high dielectric constant. *J. Mater. Chem. C.* **2**, 1658 (2014).
- [R9] Szczepanski, J., Danner, P. M. & Opris D. M. Self-healable, self-repairable, and recyclable electrically responsive artificial muscles. *Adv. Sci.* **9**, 2202153 (2022).
- [R10] Liu, L. et al. Understanding reversible Maxwellian electroactuation in a 3M VHB dielectric elastomer with prestrain. *Polymer* **144**, 150-158 (2018).
- [R11] Tan, M. W. M., Thangavel, G. & Lee, P. S. Enhancing dynamic actuation performance of dielectric elastomer actuators by tuning viscoelastic effects with polar crosslinking. *NPG Asia Mater.* **11**, 62 (2019).
- [R12] Li, Y. & Hashimoto, M. PVC gel based artificial muscles: Characterizations and actuation modular constructions. *Sens. Actuators A: Phys.* **233**, 246-258 (2015).
- [R13] Pelrine, R., Kornbluh, R., Pei, Q. B. & Joseph, J. High-speed electrically actuated elastomers with strain greater than 100%. *Science* **287**, 836-845 (2000).
- [R14] Yin, L. J. et al. Soft, tough, and fast polyacrylate dielectric elastomer for non-magnetic motor. *Nat. Commun.* **12**, 4517 (2021).
- [R15] Topper, T., Osmani, B., Lorcher, S. & Muller, B. Leakage current, self-clearing and actuation efficiency of nanometer-thin, low-voltage dielectric elastomer transducers tailored by thermal evaporation. *Proc. SPIE* **10163**, 101631F (2017).
- [R16] Huang J. J. et al. Vinylsilane-rich silicone filled by polydimethylsiloxane encapsulated carbon black particles for dielectric elastomer actuator with enhanced out-of-plane actuations. *Chem. Eng. J.* **428**, 131354 (2022).
- [R17] Chen, Z. Q. et al. Ultrasoft-yet-strong pentablock copolymer as dielectric elastomer highly responsive to low voltages. *Chem. Eng. J.* **405**, 126634 (2021).
- [R18] Zhao, Y. et al. Remarkable electrically actuation performance in advanced acrylic-based dielectric elastomers without pre-strain at very low driving electric field. *Polymer* **137**, 269-275 (2018).

Reviewers' Comments:

Reviewer #1:

Remarks to the Author:

I have carefully read the response from the authors according to the suggestion of reviewer 2. all of 6 comments is explained or added some new contents to make a good understanding for potential readers. Though the dielectric material in this manuscript has also several disadvantages, the content in this revision is very rich and gives a new insight to learn the dielectric elastomer actuator. In this case, I suggest this revision with high quality can be considered to accept.

Reviewer #3:

Remarks to the Author:

The authors have conducted detailed experiments to compare the new PVC material with the existing materials. The results are encouraging. The paper can be recommended subject to the following minor revisions.

In the revised manuscript, the authors compared the actuation strain of PVC with VHB 4910 at the same electric field, which was called a "fair comparison", and stated the actuation performance is better, which I still do not fully agree. The reason is that as an dielectric actuation material, the energy conversion density is proportional to permittivity\*electric field squared. The key material parameter is the electrical breakdown strength. As the authors cited, many literatures have made efforts in improving the permittivity and lowering modulus but not in breakdown strength. That's why VHB has such an outstanding high energy conversion density in actuation as well as in energy harvesting. A detailed review can be seen in Lu et al. Mechanics of dielectric elastomer structures A review, 2020. I would suggest that the authors frankly admit that the new material is better than VHB in low-voltage actuation and low hysteresis but not in a comprehensive manner. This advantage could be helpful in many applications that do not pursue large deformation or high energy density.

**Responses to Reviewer #3:**

*COMMENT: A detailed review can be seen in Lu et al. Mechanics of dielectric elastomer structures A review, 2020. I would suggest that the authors frankly admit that the new material is better than VHB in low-voltage actuation and low hysteresis but not in a comprehensive manner. This advantage could be helpful in many applications that do not pursue large deformation or high energy density.*

**Response:** We thank for and agreed with the reviewer's comments on the comprehensive comparison between our dielectric elastomer and commercial VHB4910. Following the reviewer's suggestion, we have revised our statements throughout the manuscript by stating that "Our CEC/PVCg actuators demonstrate superior actuation performances over the existing DE actuators *under low electrical fields*". We have added more discussion on the limitation of our material compared to existing VHB4910 and PDMS in the revised manuscript at Page 4, Paragraph 3, Page 11, Paragraph 3, Page 17, Paragraph 2, and Page 17, Paragraph 3 as shown below:

*"In this study, we reported a valuable strategy to produce a PVCg-based dielectric elastomer with unprecedented properties, i.e. high permittivity, low viscoelasticity, and high flexibility, and further demonstrated its superior performances in both actuation and sensing applications, *especially under low driving electrical fields.*"*

*"Therefore, our CEC/PVCg actuators generated significantly larger actuation strains, i.e. > 5 times, than commonly used PDMS and VHB 4910 actuators *within < 22.5 V/ $\mu$ m electrical field*, which was largely attributed to the augmentation of the electromechanical coupling sensitivity  $k$  of CEC/PVCg (Fig. 3e)."*

*"As a result, the CEC/PVCg actuators demonstrate superior actuation performance over the existing DE actuators, such as PDMS and VHB 4910, *under low driving electrical fields.*"*

*"One limitation of current devices is the intrinsic low breakdown strength, i.e. 21.79 V/ $\mu$ m, of the traditional plasticized PVCg, as compared to the existing PDMS and VHB 4910. The use of higher driving electrical fields can offer *high energy conversion density and energy harvesting with VHB 4910-based actuators*<sup>51</sup>.*
