# Supplementary material for: Polyvinyl chloride-based dielectric elastomer with high permittivity and low viscoelasticity for actuation and sensing
Source: PubMed Central journal article supplement (PMC10023783; doi:10.1038/s41467-023-37178-5), 2023-03-17
Supplement: 41467_2023_37178_MOESM3_ESM.pdf [file 41467_2023_37178_MOESM3_ESM.pdf]

### **Description of Additional Supplementary Files**

File Name: Supplementary Movie 1

Description: Out-of-plane actuation for the PVCg actuator under electrical field of 1.0 Hz and 9.09 V/ $\mu\text{m}$ .

File Name: Supplementary Movie 2

Description: Out-of-plane actuation for the CEC/PVCg actuator under electrical field of 1.0 Hz and 9.09 V/ $\mu\text{m}$ .

File Name: Supplementary Movie 3

Description: Force output for the PVCg actuator, where a 100 g weight was lifted under electrical field of 1.0 Hz and 9.09 V/ $\mu\text{m}$ .

File Name: Supplementary Movie 4

Description: Force output for the CEC/PVCg actuator, where a 300 g weight was lifted under electrical field of 1.0 Hz and 9.09 V/ $\mu\text{m}$ .

File Name: Supplementary Movie 5

Description: The CEC/PVCg sensor was triggered by a linear reciprocating actuator, and the resultant sensing signal was collected by a single-chip microcomputer.

File Name: Supplementary Movie 6

Description: The CEC/PVCg sensor was used to monitor the human knee' motion, whose sensing signal was collected online in real-time by a single-chip microcomputer and a wireless transmission module.
